# Supplementary material for: Radical directed regioselective functionalization of diverse alkene derivatives
Source: Royal Society of Chemistry journal article supplement (doi:10.1039/d2nj02824g), 2022-01-01
Supplement: d2nj02824g1.pdf [file d2nj02824g1.pdf]

## Radical Directed Regioselective Functionalization of Diverse Alkene Derivatives.

Pavithira Suresh<sup>a</sup>, Subramaniyan Prasanna Kumari,<sup>a</sup> Singarajanahalli Mundarinti Krishna Reddy,<sup>a</sup> Savarimuthu Philip Anthony, Subbiah Thamotharan<sup>b</sup> and Subramaniapillai Selva Ganesan,<sup>\*a</sup>

<sup>a</sup>Department of Chemistry, School of Chemical and Biotechnology, SASTRA Deemed University, Thirumalaisamudram, Thanjavur 613401, Tamil Nadu, India. Fax: +91 (4362) 264120; E-mail: [selva@biotech.sastra.edu](mailto:selva@biotech.sastra.edu)

<sup>b</sup>Biomolecular Crystallography Laboratory, Department of Bioinformatics, School of Chemical and Biotechnology, SASTRA Deemed University, Thanjavur-613401, Tamil Nadu, India.

### Supporting information

Total number of pages: S47

#### Table of Context

| S No | Details                           | Page no |
|------|-----------------------------------|---------|
| 1    | Materials and Methods             | S2-S9   |
| 2    | Scanned copies of spectra         | S10-S41 |
| 3    | Disordered structure of <b>3b</b> | S42     |
| 3    | In silico studies                 | S43-S46 |
| 4    | References                        | S47     |

## **Materials and methods:**

All reactions were carried in oven-dried glassware with magnetic stirring. Starting material of 2-benzylidene-1,3-indandione were synthesized from aromatic aldehyde (purchased from Avra, HIMEDIA & SRL) and 1,3-indandione (Sigma Aldrich& SRL). Pivalic acid and pyruic acid were purchased from spectrochem and phenylglyoxylic acid was purchased from Alfa Asear. Silver nitrate and potassium peroxydisulfate were purchased from Merck. Acetonitrile was purchased from Ranbaxy. Double distilled water was used. Silica gel 100-200 (code 28112200) mesh size was purchased from SRL. Sodium chloride was purchased from SRL (Assay =99.5%). Melting points were uncorrected. <sup>1</sup>H NMR was recorded JEOL NMR Spectrometer (JNM-ECZ600R/S1) 600 MHz and <sup>13</sup>C 150 MHz spectrometer using TMS as an internal standard and CDCl<sub>3</sub> as a solvent. High resolution ESI mass spectra were recorded on Q-TOF & MicrOTOF-Q-II mass spectrometer.

## **Methods:**

### **General Procedure**

#### **1. Synthesis of 2-benzylidene-1,3-indandione (1a-h) derivatives**

The synthesis of 2-benzylidene-1,3-indandione derivatives were performed by modified procedure of the literature.<sup>1</sup> In the 25 mL RBF, 1,3-indandione (146 mg, 1 mmol), aryl aldehydes (1 mmol), and in methanol was added L-proline (17 mg, 0.15 mmol) and the reaction mixture was reflux for 3 h to 16 h. The completion of the reaction was monitored by Thin Layer Chromatography (TLC). The solvent was removed under reduced pressure. The crude residue was washed with methanol; formation of solid was filtered and dried to afford crude residues. The crude residues were purified by flash chromatography at 10% EtOAc in hexanes.

## 2. General procedure for the synthesis of peroxy indandione (3a-g) derivatives

A suspension of 2-benzylidene-1,3-indandione derivatives (0.1 mmol) and pivalic acid (41 mg, 0.4 mmol) in H<sub>2</sub>O:ACN (1:1 v/v) (2 mL) was stirred at room temperature. AgNO<sub>3</sub> (5 mg, 0.03 mmol) and K<sub>2</sub>S<sub>2</sub>O<sub>8</sub> (54 mg, 0.2 mmol) was added to the reaction mixture and allowed to stir till the complete the reaction. After completion, the mixture was quenched with water and extracted with ethyl acetate (3 × 5 mL). The organic layer was dried over anhydrous sodium sulfate. After drying, the organic layer was filtered, and concentrated under reduced pressure to afford crude reaction of product. The crude mixture was purified by column chromatography at 5% EtOAc in Hexane to afford pure product.

**2-(1-(4-bromophenyl)-2,2-dimethylpropyl)-2-(tert-butylperoxy)-1H-indene-1,3(2H)-dione (3a).** Yellow liquid, Yield: 68% (31 mg), <sup>1</sup>H NMR (600 MHz, CDCl<sub>3</sub>): δ = 7.88 (d, *J* = 7.8 Hz, 1H), 7.77-7.74 (m, 1H), 7.71-7.68 (m, 2H), 7.19 (dd, *J* = 7.8 Hz, 2.4 Hz, 1H), 7.13 (dd, *J* = 8.4 Hz, 2.4 Hz, 1H), 7.05 (dd, *J* = 8.4 Hz, 2.4 Hz, 1H), 6.84 (dd, *J* = 8.4 Hz, 2.4 Hz, 1H), 3.34 (s, 1H), 1.03 (s, 9H), 0.99 (s, 9H) ppm. <sup>13</sup>C NMR (150 MHz, CDCl<sub>3</sub>): δ = 199.9, 199.6, 141.9, 140.9, 135.9, 135.8, 135.7, 134.8, 131.5, 131.0, 130.2, 122.9, 122.8, 121.0, 87.6, 81.4, 60.2, 35.2, 30.4, 26.3. HRMS (ESI): calcd for C<sub>24</sub>H<sub>27</sub>BrO<sub>4</sub> [M+Na<sup>+</sup>]: 481.0985, found: 481.0986.

**2-(tert-butylperoxy)-2-(2,2-dimethyl-1-phenylpropyl)-1H-indene-1,3(2H)-dione(3b).** Off-white solid, Yield: 79% (30.2 mg), Mp: 118-121 °C. <sup>1</sup>H NMR (600 MHz, CDCl<sub>3</sub>): δ = 7.84 (d, *J* = 7.8 Hz, 1H), 7.69-7.66 (m, 1H), 7.61-7.59 (m, 2H), 7.08 (d, *J* = 7.8 Hz, 1H), 7.03–7.00 (m, 1H), 6.93 – 6.91 (m, 2H), 6.84 – 6.81 (m, 1H), 3.34 (s, 1H), 1.084 (s, 9H), 1.077 (s, 9H) ppm. <sup>13</sup>C NMR (150 MHz, CDCl<sub>3</sub>): δ = 200.1, 199.7, 142.2, 140.8, 136.6, 135.5, 135.3, 133.2, 129.7,

128.0, 127.1, 126.8, 122.7, 122.6, 88.8, 81.2, 60.9, 35.5, 30.7, 26.4. HRMS (ESI): calcd for  $C_{24}H_{28}O_4$   $[M+NH_4^+]$ : 398.2326, found: 398.2330.

**2-(tert-butylperoxy)-2-(2,2-dimethyl-1-(p-tolyl)propyl)-1H-indene-1,3(2H)-dione(3c).**

Yellowish solid, Yield: 67% (26.6 mg), Mp: 120-122 °C.  $^1H$  NMR (600 MHz,  $CDCl_3$ ):  $\delta$  = 7.84 (d,  $J$  = 7.8 Hz, 1H), 7.69-7.67 (m, 1H), 7.60 (d,  $J$  = 4.8 Hz, 2H), 6.90 (dd,  $J$  = 7.8 Hz, 1.8 Hz, 1H), 6.82-6.77 (m, 2H), 6.61 (d,  $J$  = 7.8 Hz, 1H), 3.30 (s, 1H), 2.08 (s, 3H), 1.09 (s, 9H) 1.07 (s, 9H) ppm.  $^{13}C$  NMR (150 MHz,  $CDCl_3$ ):  $\delta$  = 200.2, 199.7, 142.3, 140.8, 136.4, 135.4, 135.2, 133.3, 133.1, 129.5, 128.6, 127.8, 122.7, 122.5, 88.9, 81.1, 60.5, 35.5, 30.6, 26.4, 20.9. HRMS (ESI): calcd for  $C_{25}H_{30}NO_4$   $[M+NH_4^+]$ : 412.2482, found: 412.2503.

**2-(tert-butylperoxy)-2-(1-(4-methoxyphenyl)-2,2-dimethylpropyl)-1H-indene-1,3(2H)-**

**dione (3d).** Off-white solid, Yield: 72% (29.5 mg), Mp: 101-102 °C.  $^1H$  NMR (600 MHz,  $CDCl_3$ ):  $\delta$  = 7.84 (d,  $J$  = 7.8 Hz, 1H), 7.70-7.67 (m, 1H), 7.62-7.61 (m, 2H), 6.95 (dd,  $J$  = 2.4 Hz, 9.0 Hz, 1H), 6.83 (dd,  $J$  = 3.0 Hz, 9.0 Hz, 1H), 6.55 (dd,  $J$  = 3.0 Hz, 8.4 Hz, 1H), 6.37 (dd,  $J$  = 3.0 Hz, 8.4 Hz, 1H), 3.61 (s, 3H), 3.30 (s, 1H), 1.09 (s, 9H), 1.07 (s, 9H) ppm.  $^{13}C$  NMR (150 MHz,  $CDCl_3$ ):  $\delta$  = 200.2, 199.8, 158.3, 142.2, 140.8, 135.5, 135.3, 134.3, 130.6, 128.6, 122.7, 122.5, 113.0, 112.8, 88.9, 81.1, 60.0, 55.1, 35.6, 30.6, 26.4. HRMS (ESI): calcd for  $C_{25}H_{30}O_5$   $[M+Na^+]$ : 433.1985, found: 433.1997.

**2-(tert-butylperoxy)-2-(1-(4-chlorophenyl)-2,2-dimethylpropyl)-1H-indene-1,3(2H)-**

**dione(3e).** Off-white solid, Yield: 54% (22.3 mg), Mp: 111-113 °C.  $^1H$  NMR (600 MHz,  $CDCl_3$ ):  $\delta$  = 7.88 (d,  $J$  = 7.8 Hz, 1H), 7.76-7.74 (m, 1H), 7.70-7.69 (m, 2H), 7.18 (dd,  $J$  = 8.4 Hz, 2.4 Hz, 1H), 7.04 (dd,  $J$  = 7.8 Hz, 2.4 Hz, 1H), 6.91 – 6.89 (m, 2H), 3.35 (s, 1H), 1.03 (s, 9H), 1.00 (s, 9H) ppm.  $^{13}C$  NMR (150 MHz,  $CDCl_3$ ):  $\delta$  = 199.9, 199.7, 141.9, 140.9, 135.9, 135.7, 135.3, 134.4, 132.8, 131.1, 128.0, 127.3, 122.9, 122.7, 87.7, 81.3, 60.1, 35.3, 30.4, 26.3. HRMS (ESI): calcd for  $C_{24}H_{27}ClO_4$   $[M+NH_4^+]$ : 432.1936, found: 432.1939.

**4-(1-(2-(tert-butylperoxy)-1,3-dioxo-2,3-dihydro-1H-inden-2-yl)-2,2-**

**dimethylpropyl)benzotrile (3f).** white solid, Yield: 60% (24.1 mg), Mp: 112-114 °C. <sup>1</sup>H NMR (600 MHz, CDCl<sub>3</sub>): δ = 7.92 (d, *J* = 7.2 Hz, 1H), 7.82-7.75 (m, 3H), 7.69 (dd, *J* = 8.4 Hz, 1.2 Hz, 1H), 7.43 (dd, *J* = 7.8 Hz, 1.8 Hz, 1H), 7.36 (dd, *J* = 7.8 Hz, 1.2 Hz, 1H), 7.15 (dd, *J* = 7.8 Hz, 1.2 Hz, 1H), 3.48 (s, 1H), 0.94 (s, 9H), 0.92 (s, 9H) ppm. <sup>13</sup>C NMR (150 MHz, CDCl<sub>3</sub>): δ = 199.5, 199.4, 142.8, 141.6, 141.0, 136.3, 136.1, 133.6, 131.5, 131.1, 130.8, 123.1, 123.0, 118.9, 110.7, 86.3, 81.6, 60.7, 35.0, 30.2, 26.1. HRMS (ESI): calcd for C<sub>25</sub>H<sub>27</sub>NO<sub>4</sub> [M+Na<sup>+</sup>]: 428.1832, found: 428.1831.

**2-(tert-butylperoxy)-2-(2,2-dimethyl-1-(4-nitrophenyl)propyl)-1H-indene-1,3(2H)-**

**dione(3g).** Off-white solid, Yield: 60% (25.7 mg), Mp: 88-90 °C. <sup>1</sup>H NMR (600 MHz, CDCl<sub>3</sub>): δ = 8.01 (dd, *J* = 2.4 Hz, 8.4 Hz, 1H), 7.98-7.94 (m, 2H), 7.84-7.81 (m, 3H), 7.79-7.77 (m, 1H), 7.23 (dd, *J* = 1.8 Hz, 8.4 Hz, 1H), 3.57 (s, 1H), 0.93 (s, 9H), 0.91 (s, 9H) ppm. <sup>13</sup>C NMR (150 MHz, CDCl<sub>3</sub>): δ = 199.5, 199.4, 146.8, 145.0, 141.5, 141.1, 136.4, 136.2, 133.8, 131.2, 123.2, 123.1, 122.8, 122.2, 86.0, 81.6, 60.4, 35.0, 30.2, 26.1. HRMS (ESI): calcd for C<sub>24</sub>H<sub>27</sub>NO<sub>4</sub> [M+K<sup>+</sup>]: 464.1470, found: 464.1471.

### 3. Synthesis of acetyl indandione (4a-g) derivatives.

A suspension of 2-benzylidene-1,3-indandione derivatives (0.2 mmol) and pyruvic acid (35.2 mg, 0.4 mmol) in 2 mL of H<sub>2</sub>O:ACN (1:1 v/v) was stirred at room temperature. AgNO<sub>3</sub> (5 mg, 0.03 mmol) and K<sub>2</sub>S<sub>2</sub>O<sub>8</sub> (54 mg, 0.2 mmol) was added to the reaction mixture and allowed to complete the reaction. After completion, the mixture was quenched with water (3 mL) and extracted with ethyl acetate (3 × 5 mL). The organic layer was dried over anhydrous sodium sulfate. After drying, the organic layer was filtered, and concentrated under reduced pressure

to afford crude reaction of product. The crude mixture was purified by column chromatography at 10% to 20%EtOAc in hexanes to afford pure product.

**2-(2-oxo-1-phenylpropyl)-1H-indene-1,3(2H)-dione (4a)** Off-white solid, Yield: 85% (47.3 mg), Mp: 115-118 °C. <sup>1</sup>H NMR (600 MHz, CDCl<sub>3</sub>): δ = 7.97-7.92 (m, 2H), 7.83-7.77 (m, 2H), 7.51-7.49 (m, 2H), 7.40-7.38 (m, 2H), 7.34-7.31 (m, 1H), 4.63 (d, *J* = 3 Hz, 1H), 3.35 (d, *J* = 3 Hz, 1H), 2.02 (s, 3H) ppm. <sup>13</sup>C NMR (150 MHz, CDCl<sub>3</sub>): δ = 206.2, 198.8, 198.7, 142.7, 141.2, 136.3, 135.6, 135.1, 130.3, 129.1, 128.1, 123.3, 123.1, 60.1, 55.6, 28.2. HRMS (ESI): calcd for C<sub>18</sub>H<sub>14</sub>O<sub>3</sub> [M+Na<sup>+</sup>]: 301.0835, found: 301.0840.

**2-(2-oxo-1-(*p*-tolyl)propyl)-1H-indene-1,3(2H)-dione (4b)** yellow liquid, Yield: 77% (45.1 mg), <sup>1</sup>H NMR (600 MHz, CDCl<sub>3</sub>): δ = 7.96-7.92 (m, 2H), 7.82-7.77 (m, 2H), 7.37 (d, *J* = 8.4 Hz, 2H), 7.19 (d, *J* = 7.8 Hz, 2H), 4.60 (d, *J* = 2.4 Hz, 1H), 3.32 (d, *J* = 3.0 Hz, 1H), 2.34 (s, 3H), 2.02 (s, 3 H) ppm. <sup>13</sup>C NMR (150 MHz, CDCl<sub>3</sub>): δ = 206.5, 198.9, 198.8, 142.8, 141.2, 137.8, 135.6, 135.1, 133.2, 130.1, 129.8, 123.3, 123.1, 59.7, 55.6, 28.1, 21.2. HRMS (ESI): calcd for C<sub>19</sub>H<sub>16</sub>O<sub>3</sub> [M+Na<sup>+</sup>]: 315.0992, found: 315.0978.

**2-(1-(4-methoxyphenyl)-2-oxopropyl)-1H-indene-1,3(2H)-dione(4c)** Off-white solid, Yield: 67% (41.5 mg), Mp: 106-109 °C. <sup>1</sup>H NMR (600 MHz, CDCl<sub>3</sub>): δ = 7.96-7.91 (m, 2H), 7.82-7.77 (m, 2H), 7.41-7.39 (m, 2H), 6.91-6.90 (m, 2H), 4.58 (d, *J* = 3 Hz, 1H), 3.80 (s, 3H), 3.33 (d, *J* = 3.0 Hz, 1H), 2.01 (s, 3H) ppm. <sup>13</sup>C NMR (150 MHz, CDCl<sub>3</sub>): δ = 206.5, 198.9, 159.3, 142.8, 141.3, 135.6, 135.1, 131.5, 128.2, 123.3, 123.1, 114.4, 59.3, 55.7, 55.4, 28.0. HRMS (ESI): calcd for C<sub>19</sub>H<sub>16</sub>O<sub>4</sub> [M+Na<sup>+</sup>]: 331.0941, found: 331.0951.

**2-(1-(4-nitrophenyl)-2-oxopropyl)-1H-indene-1,3(2H)-dione (4d)** Brownish semi solid, Yield: 53% (34.8 mg), <sup>1</sup>H NMR (600 MHz, CDCl<sub>3</sub>): δ = 8.28-8.27 (m, 2H), 8.00-7.96 (m, 2H), 7.88-7.83 (m, 2H), 7.75-7.73 (m, 2H), 4.74 (d, *J* = 3.0 Hz, 1H), 3.40 (d, *J* = 3.0 Hz, 1H), 2.07

(s, 3H) ppm.  $^{13}\text{C}$  NMR (150 MHz,  $\text{CDCl}_3$ ):  $\delta = 204.3, 198.2, 197.8, 147.8, 143.4, 142.5, 141.1, 135.9, 135.5, 131.4, 124.2, 123.5, 123.3, 59.2, 55.2, 28.4$ . HRMS (ESI): calcd for  $\text{C}_{18}\text{H}_{13}\text{NO}_5$   $[\text{M}+\text{H}^+]$ : 324.0866, found: 324.0851.

**2-(1-(4-chlorophenyl)-2-oxopropyl)-1*H*-indene-1,3(2*H*)-dione (4e)** yellow liquid, Yield: 52% (32.8 mg),  $^1\text{H}$  NMR (600 MHz,  $\text{CDCl}_3$ ):  $\delta = 7.98\text{-}7.94$  (m, 2H), 7.85-7.80 (m, 2H), 7.48-7.46 (m, 2H), 7.38-7.37 (m, 2H), 4.61 (d,  $J = 2.4$  Hz, 1H), 3.35 (d,  $J = 3.0$  Hz, 1H), 2.04 (s, 3H) ppm.  $^{13}\text{C}$  NMR (150 MHz,  $\text{CDCl}_3$ ):  $\delta = 205.6, 198.6, 198.4, 142.6, 141.2, 135.7, 135.3, 134.7, 134.2, 131.7, 129.3, 123.3, 123.2, 59.2, 55.4, 28.1$ . HRMS (ESI): calcd for  $\text{C}_{18}\text{H}_{13}\text{ClO}_3$   $[\text{M}+\text{Na}^+]$ : 335.0445, found: 335.0463.

**2-(1-(4-bromophenyl)-2-oxopropyl)-1*H*-indene-1,3(2*H*)-dione (4f)** Yellow liquid, Yield: 79% (56.2 mg),  $^1\text{H}$  NMR (600 MHz,  $\text{CDCl}_3$ ):  $\delta = 7.97\text{-}7.93$  (m, 2H), 7.84-7.79 (m, 2H), 7.53-7.51 (m, 2H), 7.40-7.39 (m, 2H), 4.57 (d,  $J = 3.0$  Hz, 1H), 3.33 (d,  $J = 3.0$  Hz, 1H), 2.02 (s, 3H) ppm.  $^{13}\text{C}$  NMR (150 MHz,  $\text{CDCl}_3$ ):  $\delta = 206.5, 198.6, 198.4, 142.6, 141.2, 135.7, 135.3, 135.2, 132.3, 132.0, 123.4, 123.2, 122.4, 59.3, 55.4, 28.2$ . HRMS (ESI): calcd for  $\text{C}_{18}\text{H}_{13}\text{BrO}_3$   $[\text{M}+\text{H}^+]$ : 357.0121, found: 357.0144.

**2-(1-(Furan-2-yl)-2-oxopropyl)-1*H*-indene-1,3(2*H*)-dione (4g)** Brown liquid, Yield: 55% (29.4 mg),  $^1\text{H}$  NMR (600 MHz,  $\text{CDCl}_3$ ):  $\delta = 7.97\text{-}7.95$  (m, 2H), 7.82-7.81 (m, 2H), 7.413-7.410 (m, 1H), 6.56 (d,  $J = 3.0$  Hz, 1H), 6.394-6.386 (m, 1H), 4.72 (d,  $J = 3.0$  Hz, 1H), 3.48 (d,  $J = 3.0$  Hz, 1H), 2.09 (s, 3H) ppm.  $^{13}\text{C}$  NMR (150 MHz,  $\text{CDCl}_3$ ):  $\delta = 204.0, 198.1, 197.8, 149.6, 142.6, 142.5, 141.5, 135.6, 135.3, 123.4, 123.2, 111.3, 110.2, 54.5, 52.2, 27.9$ . HRMS (ESI): calcd for  $\text{C}_{16}\text{H}_{12}\text{O}_4$   $[\text{M}+\text{Na}^+]$ : 291.0628, found: 291.0628.

#### 4. Synthesis of benzoyl indandione (5a):

A suspension of 2-(4-methoxybenzylidene)-1H-indene-1,3(2H)-dione (52 mg, 0.2 mmol) and 2-oxo-2-phenylacetic acid (75 mg, 0.5 mmol) in 2 mL of H<sub>2</sub>O:ACN (1:1 v/v) was stirred at room temperature. AgNO<sub>3</sub> (10 mg, 0.06 mmol) and K<sub>2</sub>S<sub>2</sub>O<sub>8</sub> (108 mg, 0.4 mmol) was added to the reaction mixture and allowed to stir for further 16 h. After completion of the reaction, the mixture was quenched with water (3 mL) and extracted with ethyl acetate (3 × 5 mL).

The organic layer was dried over anhydrous sodium sulfate. After drying, the organic layer was filtered, and concentrated under reduced pressure to afford crude reaction product. The crude mixture was purified by column chromatography at 20% EtOAc in hexanes to afford pure product.

**2-(1-(4-methoxyphenyl)-2-oxo-2-phenylethylidene)-1H-indene-1,3(2H)-dione (5a)** Yellow solid, Yield: 66% (48.9 mg), Mp: 77-79 °C. <sup>1</sup>H NMR (600 MHz, CDCl<sub>3</sub>): δ = 7.97-7.92 (m, 3H), 7.83-7.74 (m, 5H), 7.54-7.52 (m, 1H), 7.44-7.41 (m, 2H), 6.94 (d, *J* = 7.8 Hz, 2H), 3.85 (s, 3H) ppm. <sup>13</sup>C NMR (150 MHz, CDCl<sub>3</sub>): δ = 196.1, 189.7, 188.1, 163.2, 159.3, 142.4, 140.0, 135.8, 135.6, 135.5, 133.7, 133.3, 129.1, 128.9, 123.40, 123.36, 123.3, 114.1, 55.6. HRMS (ESI): calcd for C<sub>24</sub>H<sub>16</sub>O<sub>4</sub> [M+Na<sup>+</sup>]: 391.0941, found: 391.0930.

#### 5. Reaction with 1,4-dione (6a-b) derivatives

A suspension of 1,4-dione derivatives (0.4 mmol) and pivalic acid (66 mg, 0.65 mmol) in 2 mL of H<sub>2</sub>O:ACN (1:1 v/v) was stirred at room temperature. AgNO<sub>3</sub> (10 mg, 0.06 mmol) and K<sub>2</sub>S<sub>2</sub>O<sub>8</sub> (108 mg, 0.4 mmol) was added to the reaction mixture and allowed to stir for further 16 h. After completion of the reaction, the mixture was quenched with water and extracted with ethyl acetate (3 × 5 mL). The organic layer was dried over anhydrous sodium sulfate. After drying, the organic layer was filtered, and concentrated under reduced pressure to afford



crude reaction of product. The crude mixture was purified by column chromatography at 5% EtOAc in hexanes to afford pure product.

**2-(*tert*-butyl)cyclohexa-2,5-diene-1,4-dione (6a)**<sup>2</sup> Brownish liquid, Yield: 61% (39.8 mg) (85%)<sup>#</sup> <sup>1</sup>H NMR (600 MHz, CDCl<sub>3</sub>):  $\delta$  = 6.67 (s (br), 2H), 6.58 (s (br), 1H), 1.27 (s, 9H). <sup>#</sup> - yield based on recovery starting material.

**2-(*tert*-butyl)naphthalene-1,4-dione (6b)** Yellow solid, Yield: 74% (63.4 mg), (94%)<sup>#</sup>, Mp: 73-74 °C (Lit 76 °C)<sup>3</sup>. <sup>1</sup>H NMR (600 MHz, CDCl<sub>3</sub>):  $\delta$  = 8.08-8.07 (m, 1H), 8.03-8.01 (m, 1H), 7.73-7.67(m, 2H), 6.83 (s, 1H), 1.36 (s, 9H) ppm. <sup>#</sup> - yield based on recovery starting material.

## 6. Reaction with TBHP

A suspension of 2-benzylidene-1,3-indandione(23 mg, 0.1 mmol) and pyruvic acid (35 mg, 0.4mmol) in 2 mL of H<sub>2</sub>O:ACN (1:1 v/v) was stirred at room temperature. 70% TBHP solution in water (200  $\mu$ L, 0.02 mmol) and K<sub>2</sub>S<sub>2</sub>O<sub>8</sub> (54 mg, 0.2 mmol) was added to the reaction and allowed for 16 h. After completion of the reaction, the mixture was quenched with water and extract with ethyl acetate (3  $\times$  5 mL). The organic layer was dried over anhydrous sodium sulfate. After drying, the organic layer was filtered, and concentrated under reduced pressure to afford crude reaction of product. The crude mixture was purified by column chromatography at 10% EtOAc in hexanes to afford pure product.

**3'-phenylspiro[indene-2,2'-oxirane]-1,3-dione (7)**. white solid, Yield: 77% (19.3 mg), Mp: 134-136 °C (Lit 140-143 °C)<sup>4</sup>. <sup>1</sup>H NMR (600 MHz, CDCl<sub>3</sub>):  $\delta$  = 8.04-8.03 (m, 1H), 7.90-7.84 (m, 3H), 7.59 (dd, *J* = 7.8 Hz, 1.8 Hz, 2H), 7.40-7.37 (m, 3H), 4.73 (s, 1H) ppm.

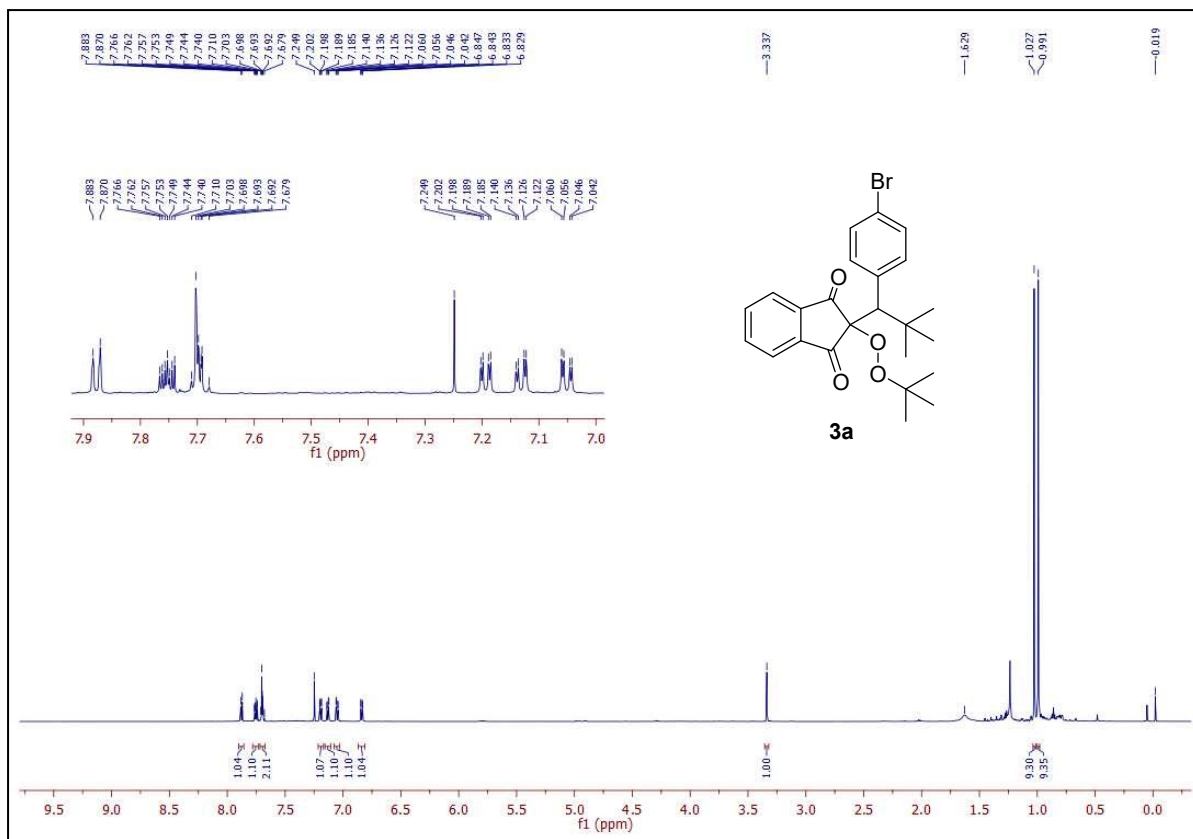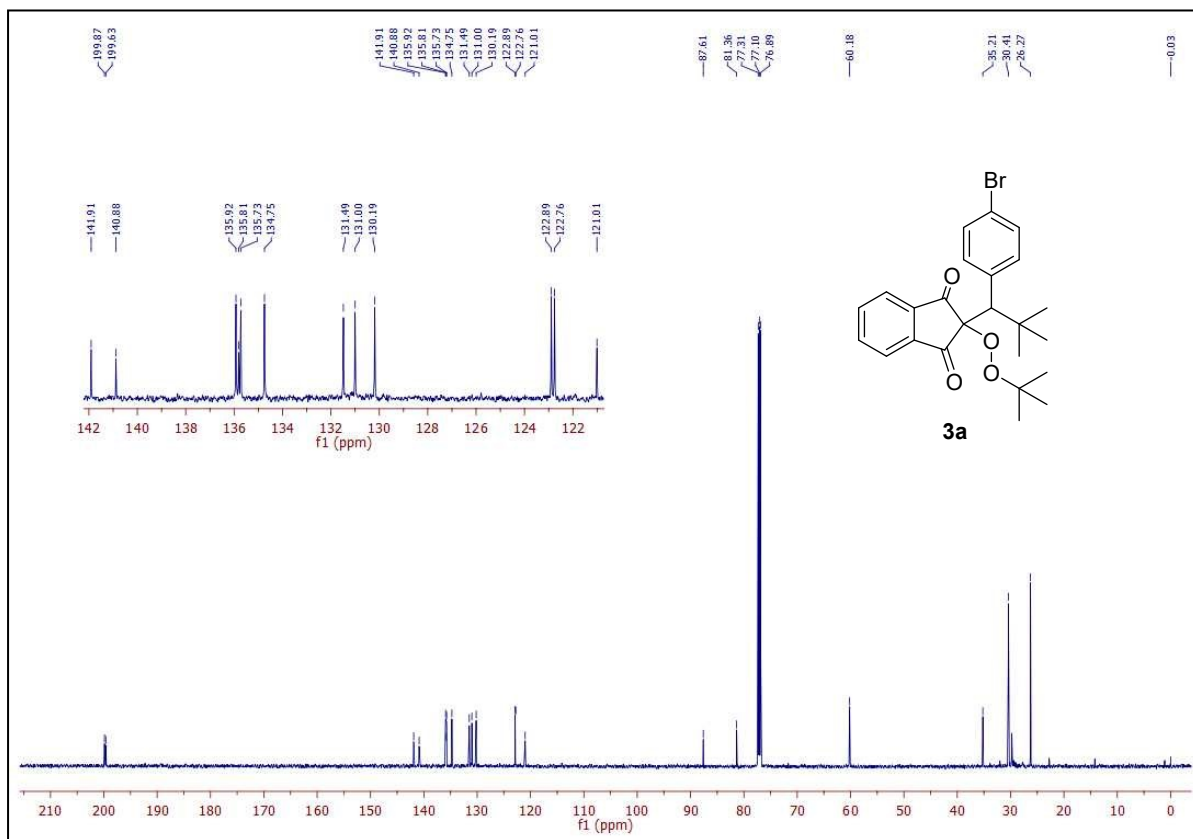

PV-4Br

IIT(ISM),DHANBAD  
Central Research Facility,HRMS

15-Dec-2021

12:53:58

PV-4Br 87 (1.568) Cm (85.99)

1: TOF MS ES+  
1.01e8

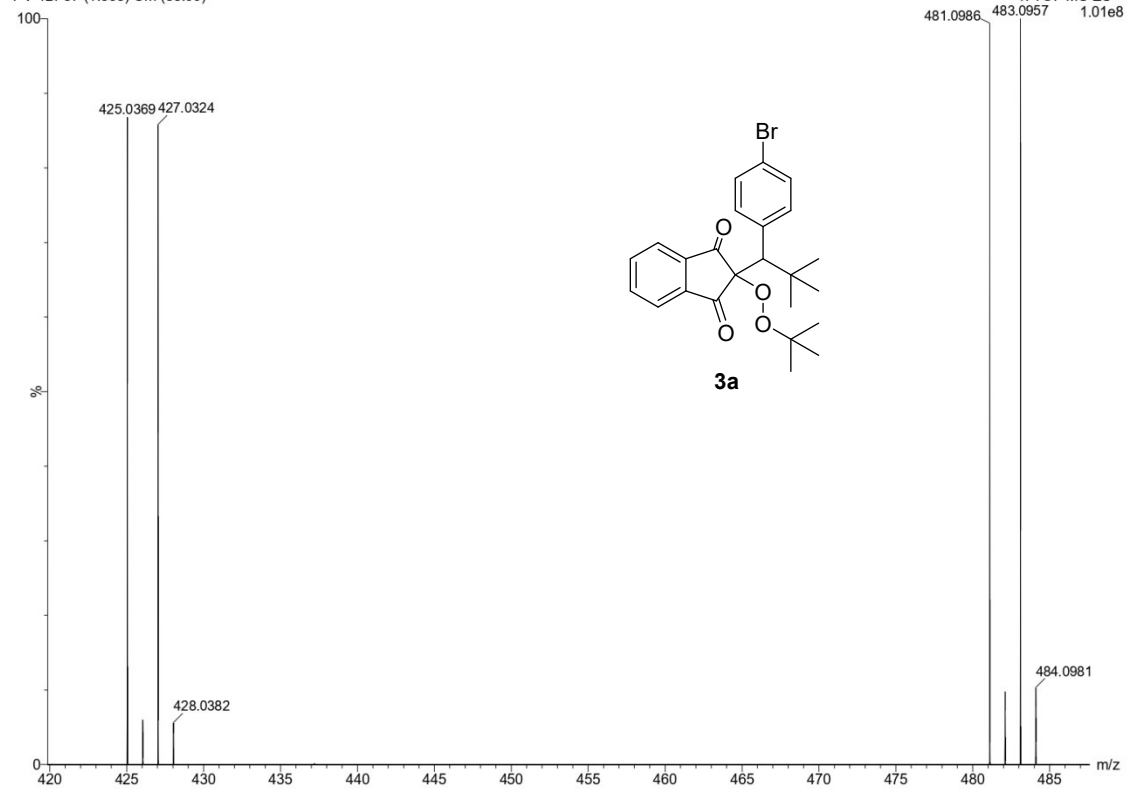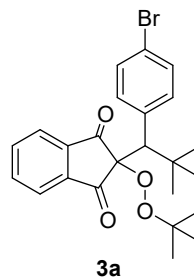

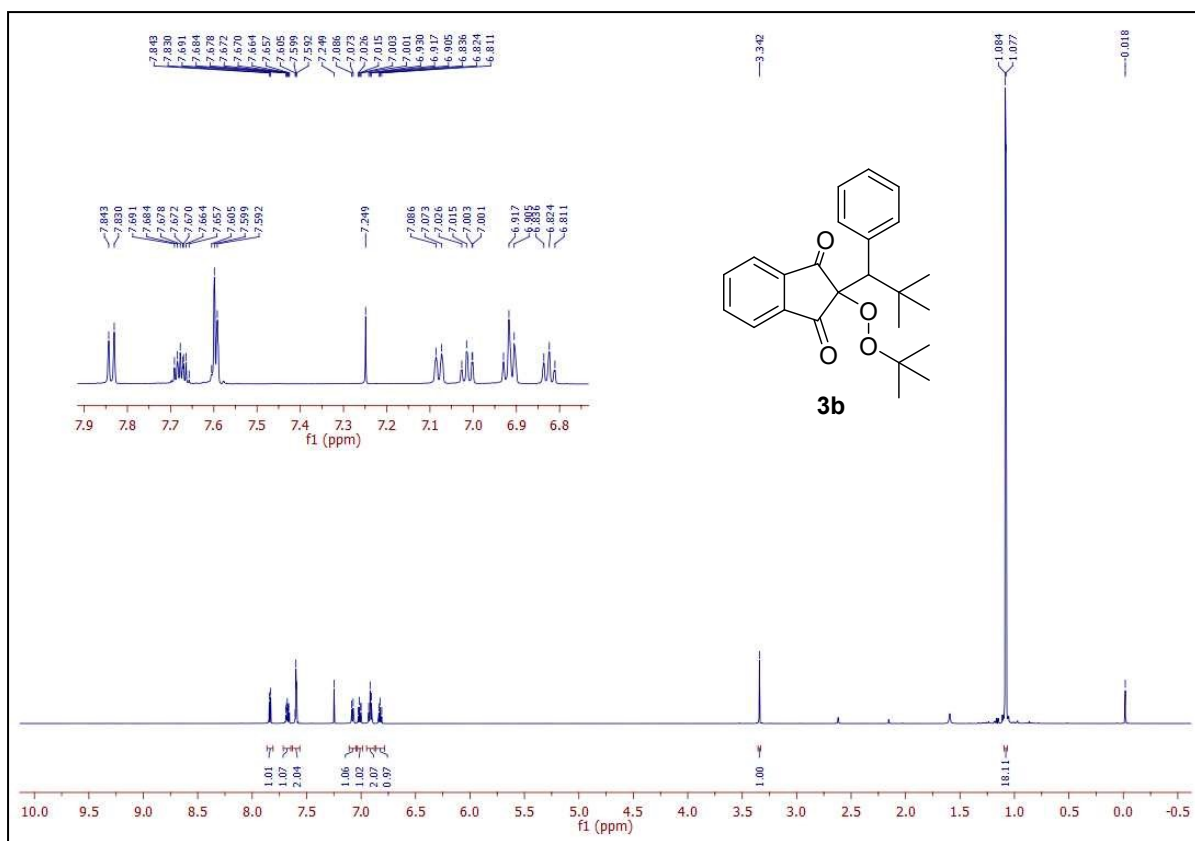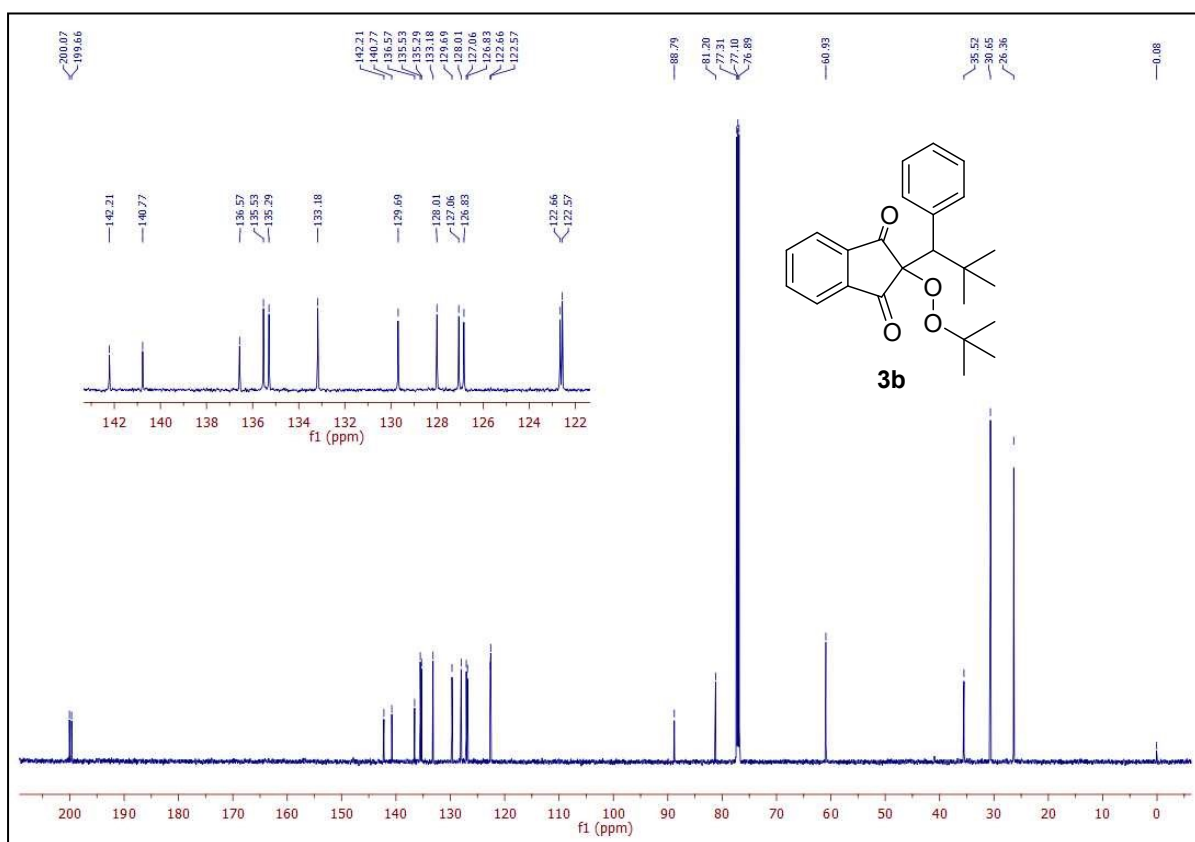

|               |                       |             |             |                 |              |                        |                       |
|---------------|-----------------------|-------------|-------------|-----------------|--------------|------------------------|-----------------------|
| Sample Name   | Pavithira S (SAIF210) | Position    | Vial 7      | Instrument Name | Instrument 1 | User Name              |                       |
| Inj Vol       | 4                     | InjPosition |             | SampleType      | Sample       | IRM Calibration Status | Success               |
| Data Filename | PV-4H.d               | ACQ Method  | ISOCRATIC.m | Comment         |              | Acquired Time          | 3/12/2021 11:18:01 AM |

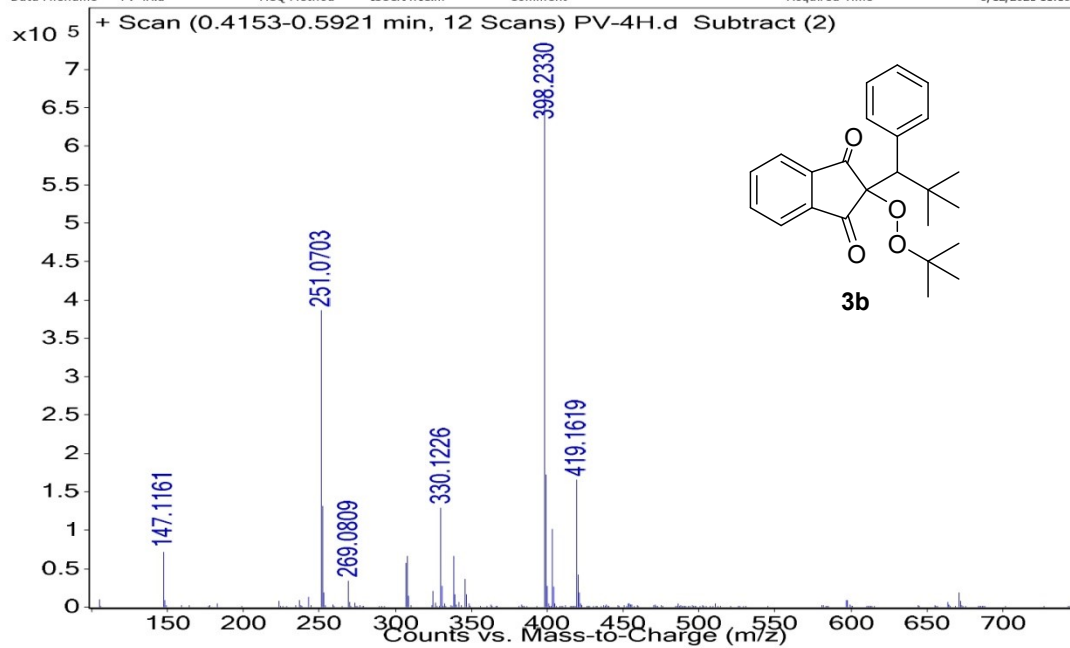

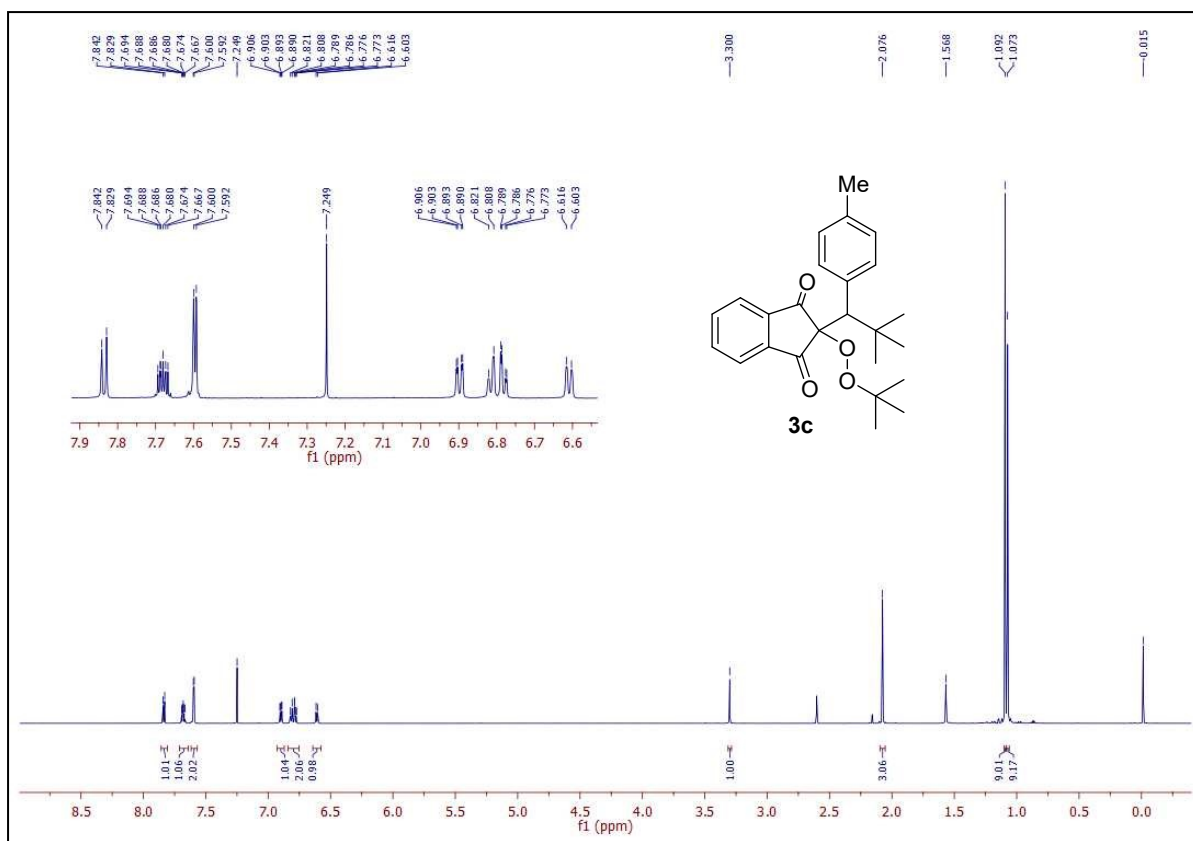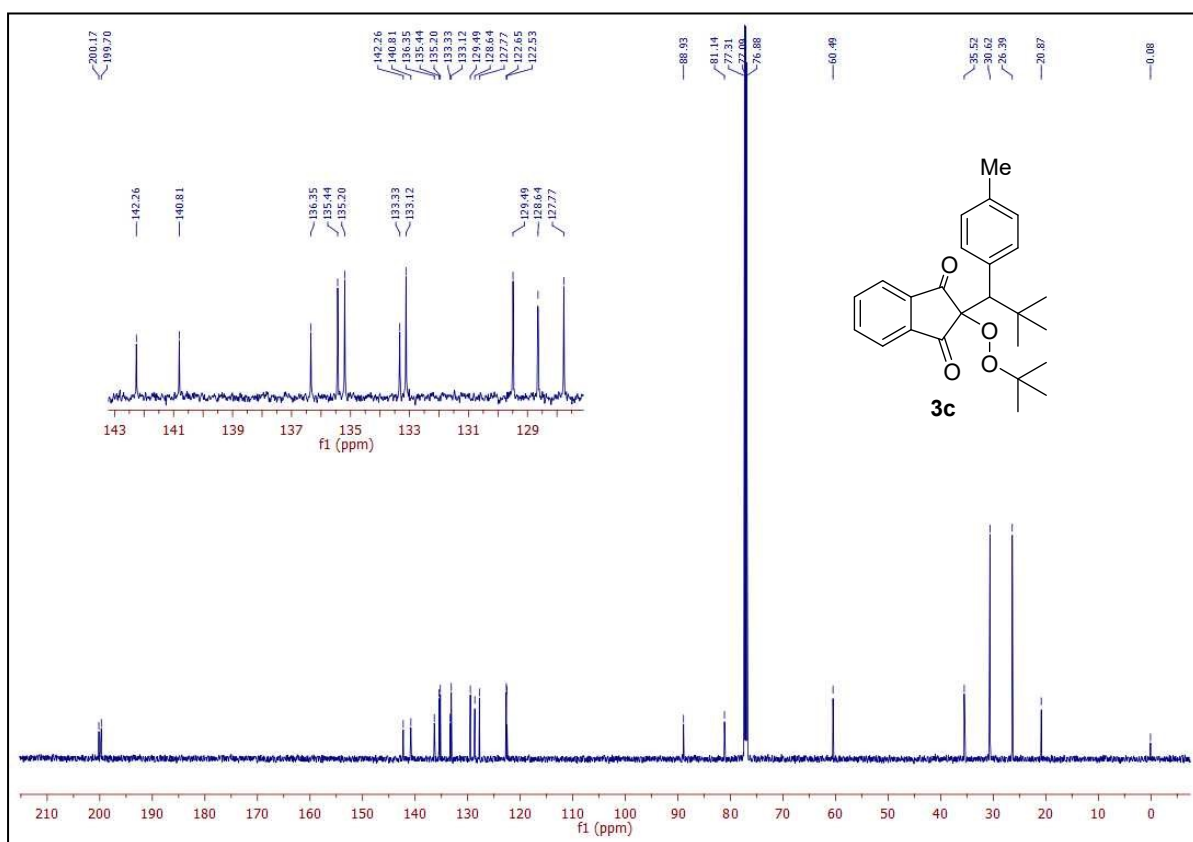

Sample Name Pavithra S (SAIF210) Position Vial 8 Instrument Name Instrument 1 User Name  
Inj Vol 4 InjPosition SampleType Sample IRM Calibration Status Success  
Data Filename PV-4CH3.d ACQ Method ISOCRATIC.m Comment Acquired Time 3/12/2021 11:21:43 AM

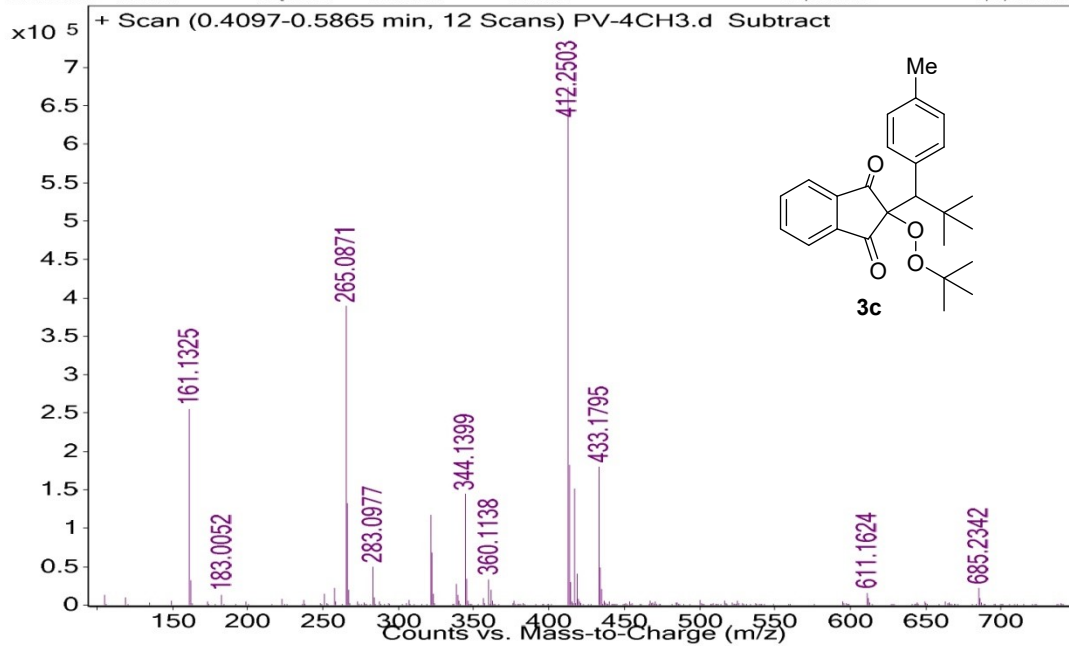

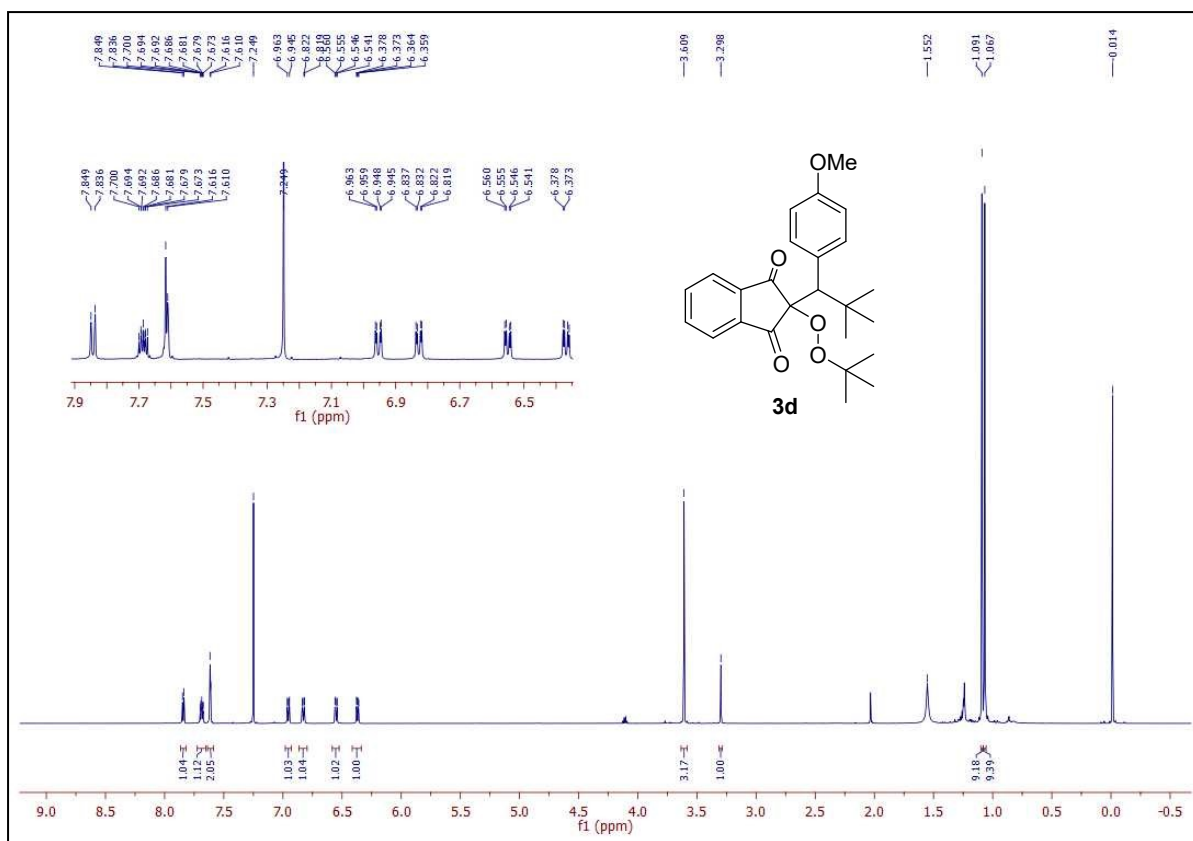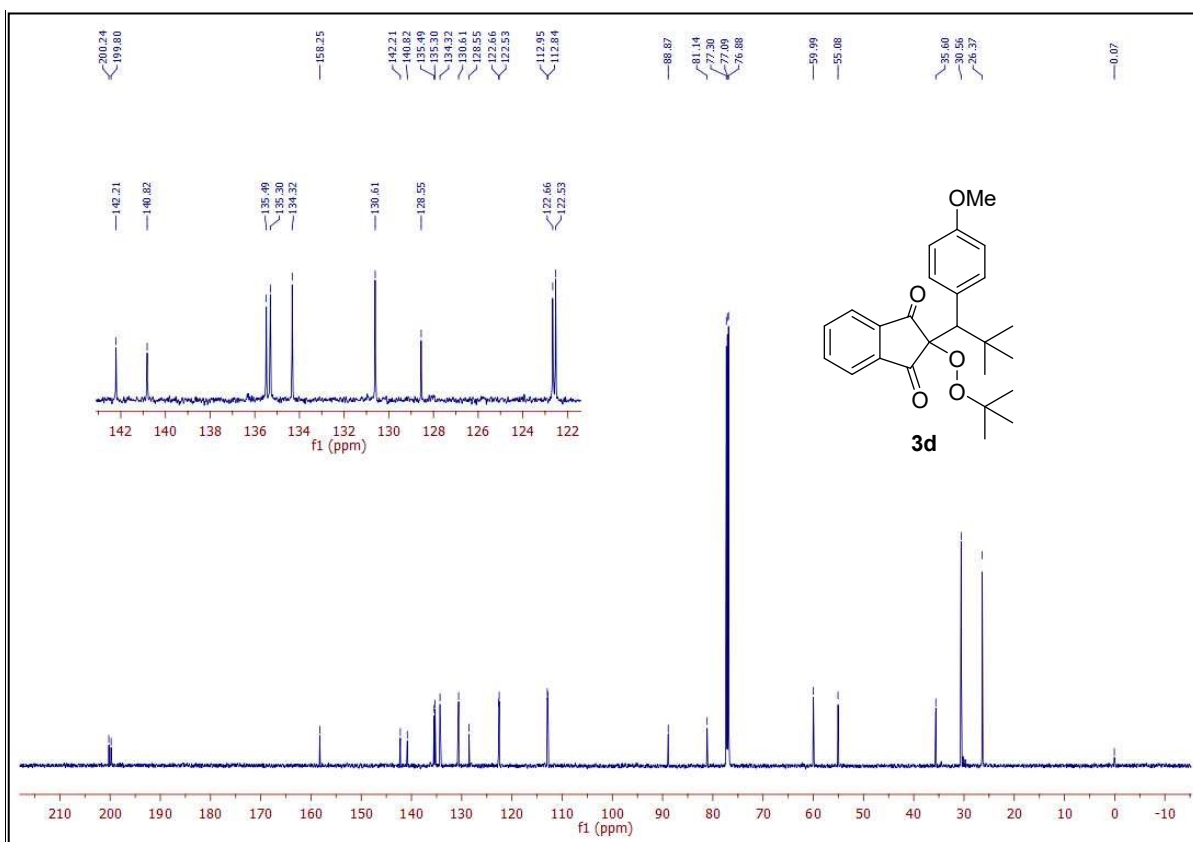



PV-OMe\_MeOH

IIT(ISM),DHANBAD  
Central Research Facility,HRMS

12-Jan-2022

13:03:20

PV-OMe\_MeOH 3 (0.079) Cm (3:4)

1: TOF MS ES+  
3.85e6

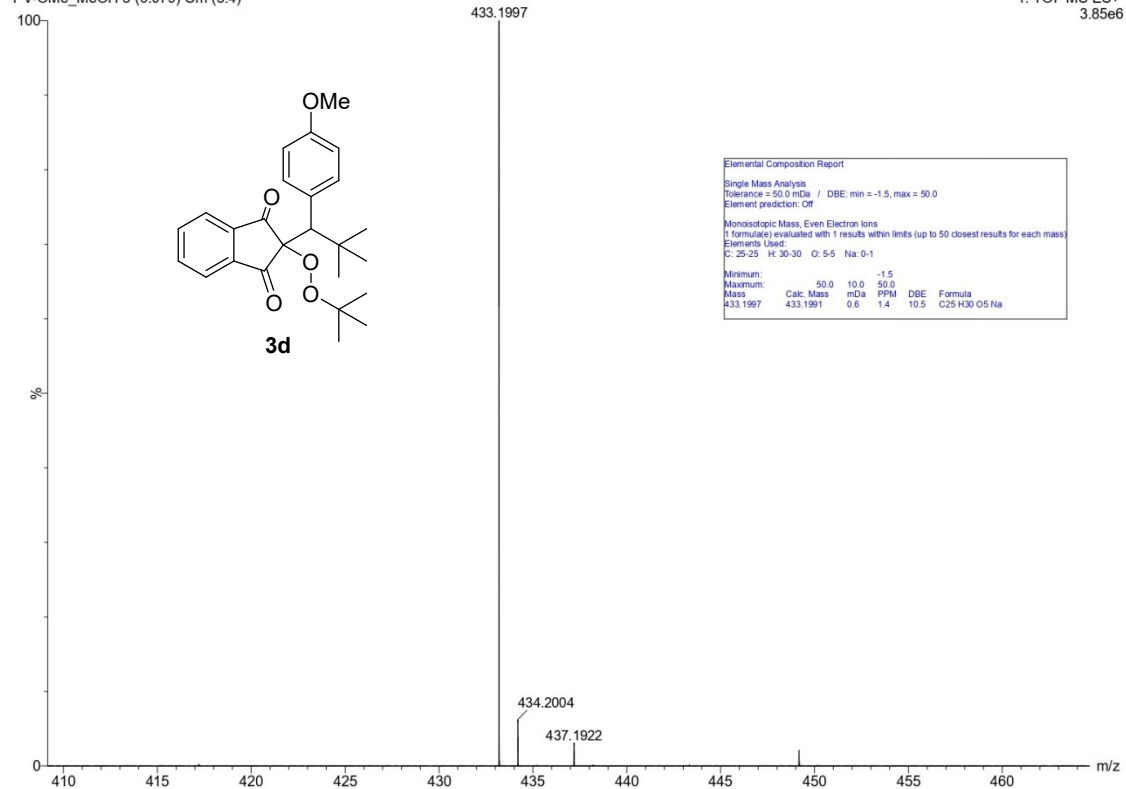

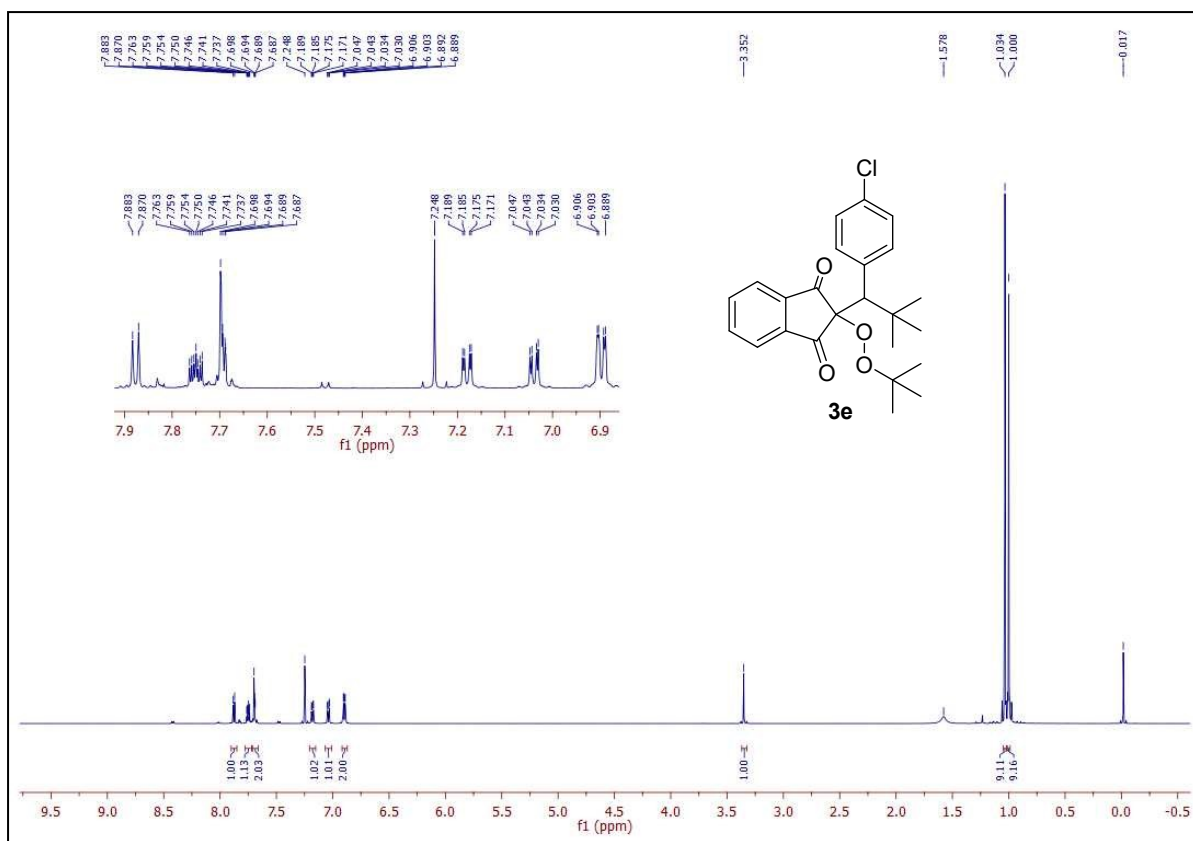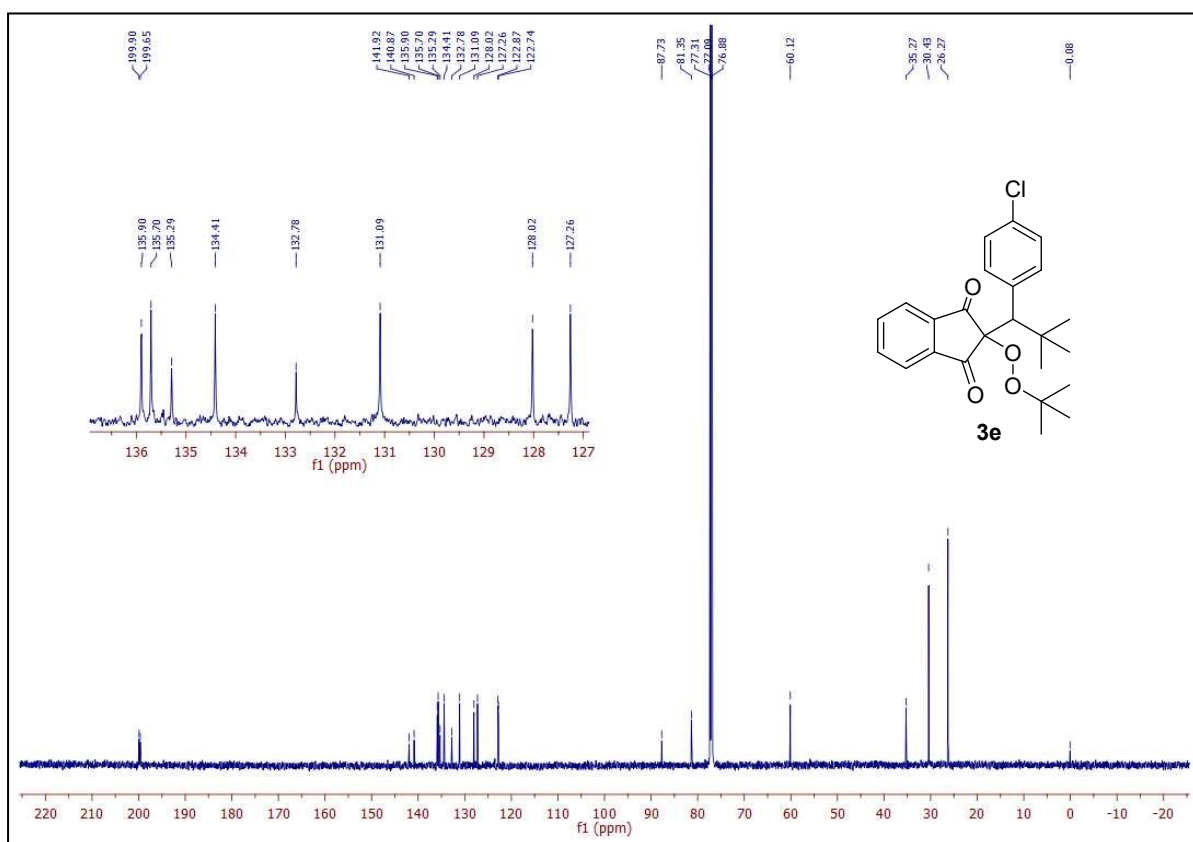

Sample Name Pavithira S(SAIF2202) Position Vial 59 Instrument Name Instrument 1 User Name  
Inj Vol 1 InjPosition SampleType Sample IRM Calibration Status Some Ions Missed  
Data Filename PV-4Cl.d ACQ Method ISOCRATIC.m Comment Acquired Time 2/16/2022 2:24:08 PM

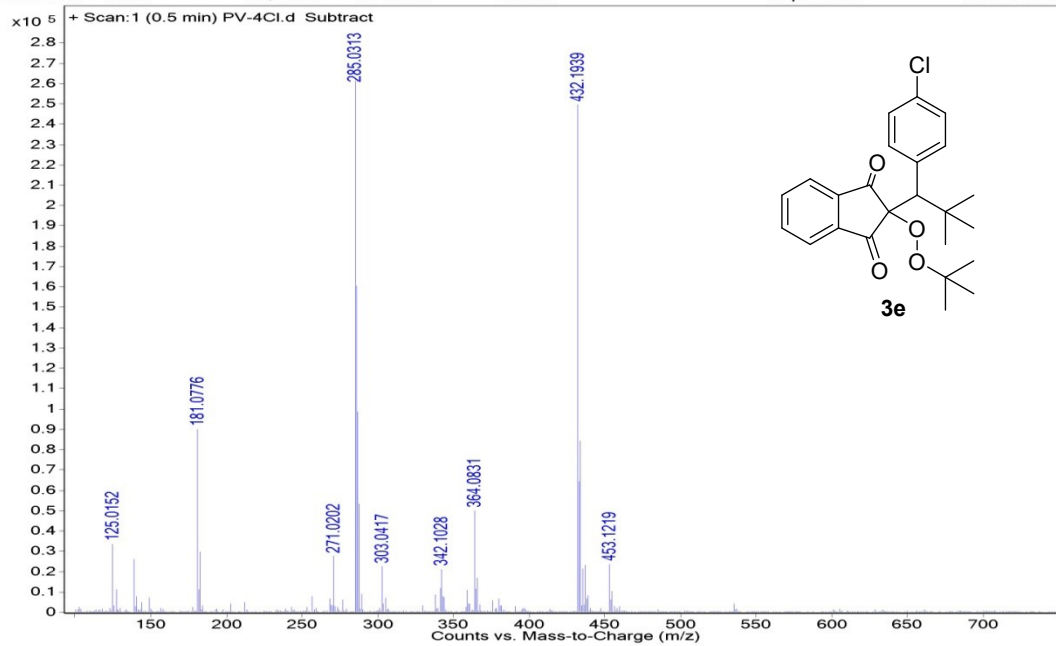



PV-CN-re\_MeOH\_H2O\_FA\_re\_check

PV-CN-re\_MeOH\_H2O\_FA\_re\_check 66 (1.202) Cm (66:70)

IIT(ISM),DHANBAD  
Central Research Facility,HRMS

11-Jan-2022  
15:53:43  
1: TOF MS ES+  
1.48e5

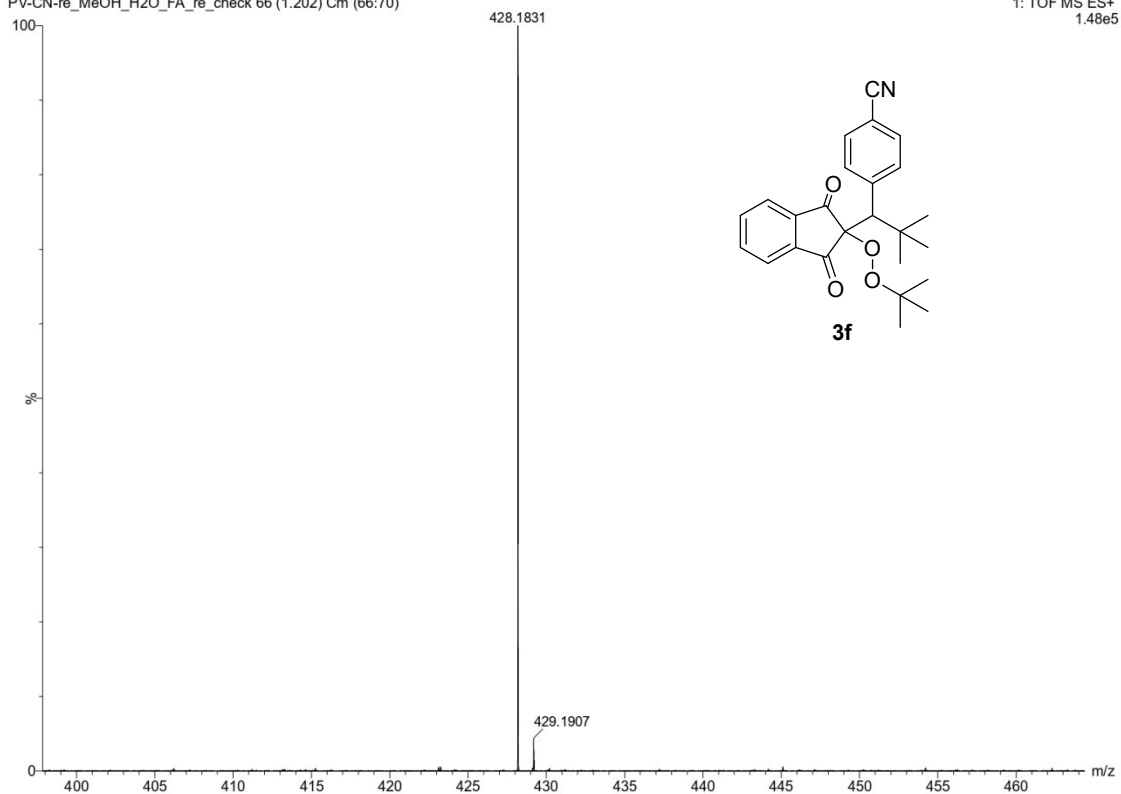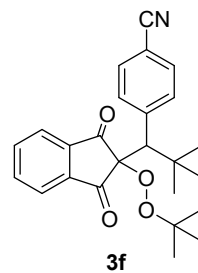

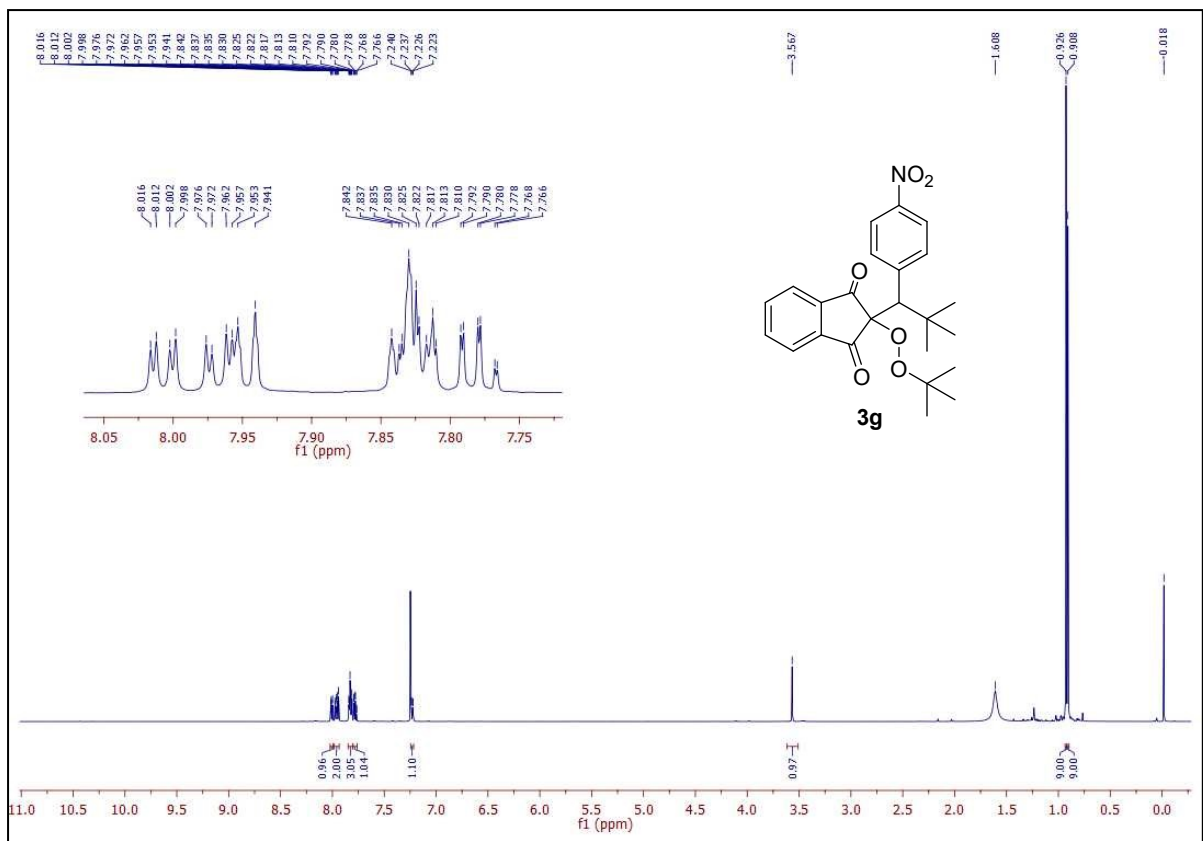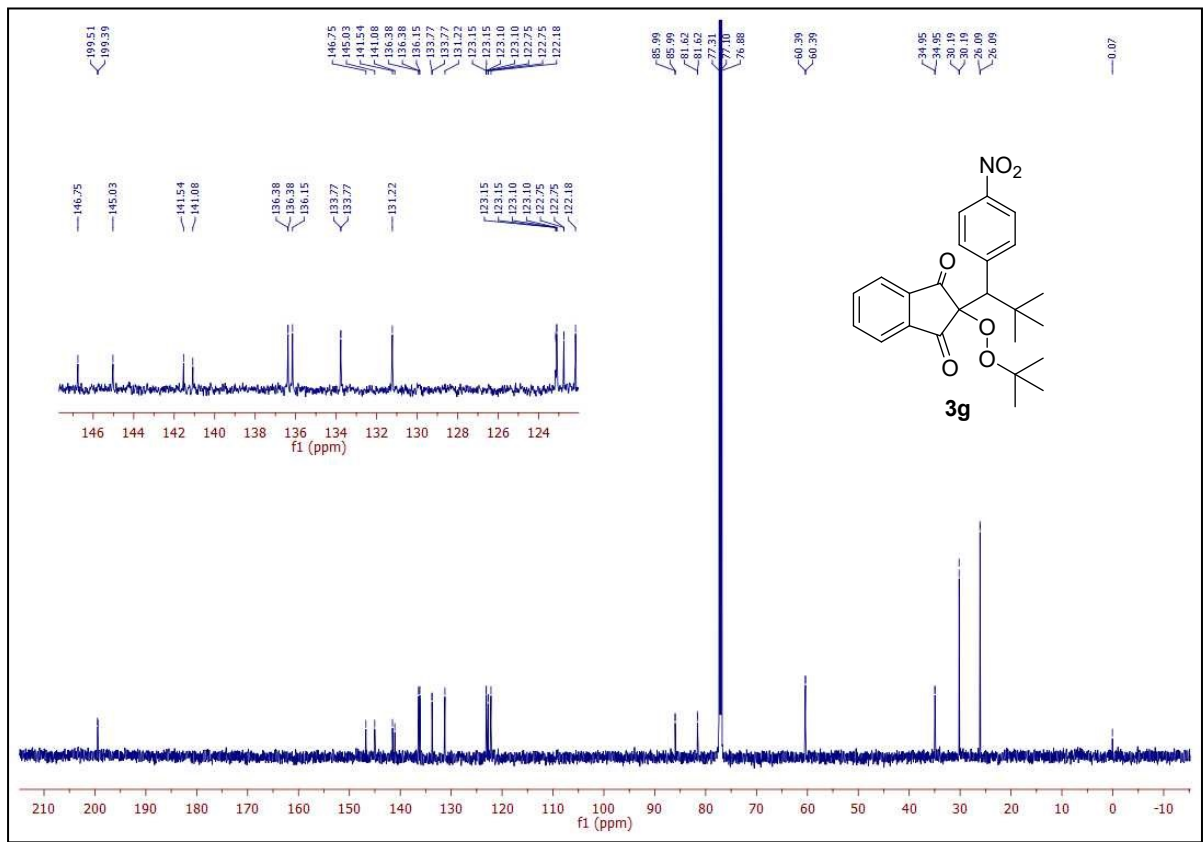

PV-4NO2\_re1

PV-4NO2\_re1 25 (0.463) Cm (21:25)

IIT(ISM),DHANBAD  
Central Research Facility,HRMS

20-Dec-2021  
11:27:13  
1: TOF MS ES+  
1.33e5

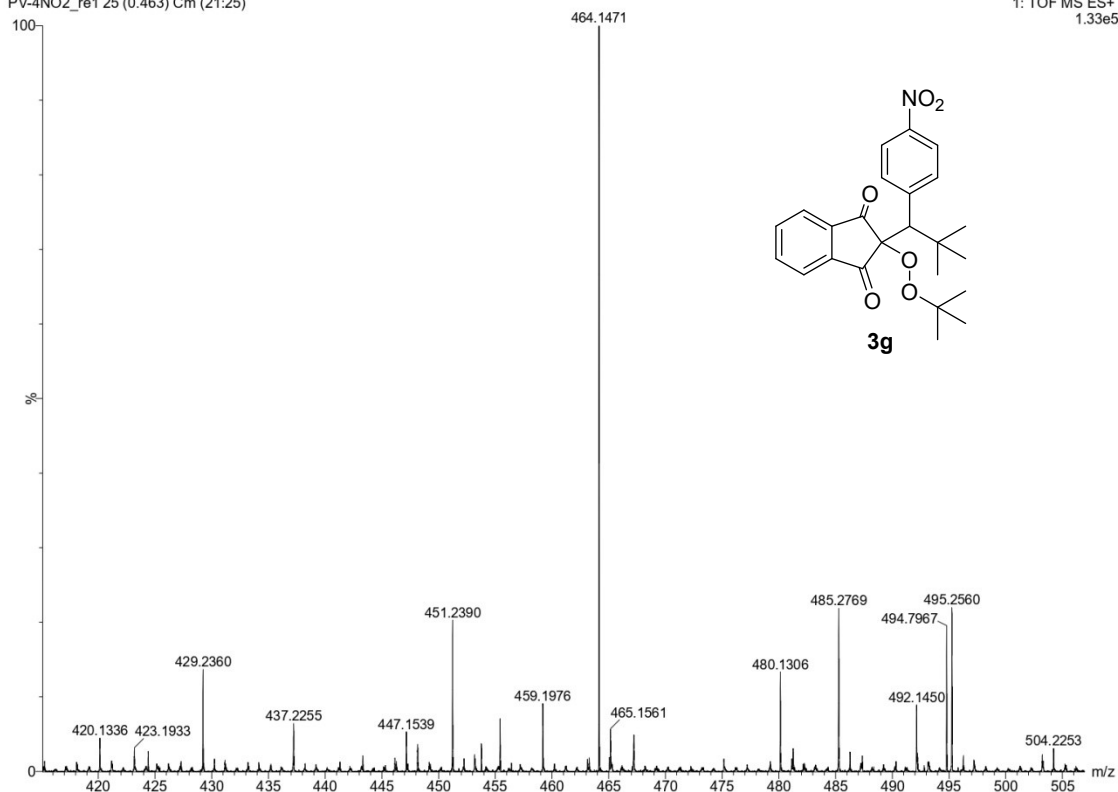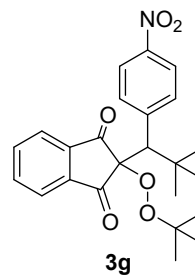

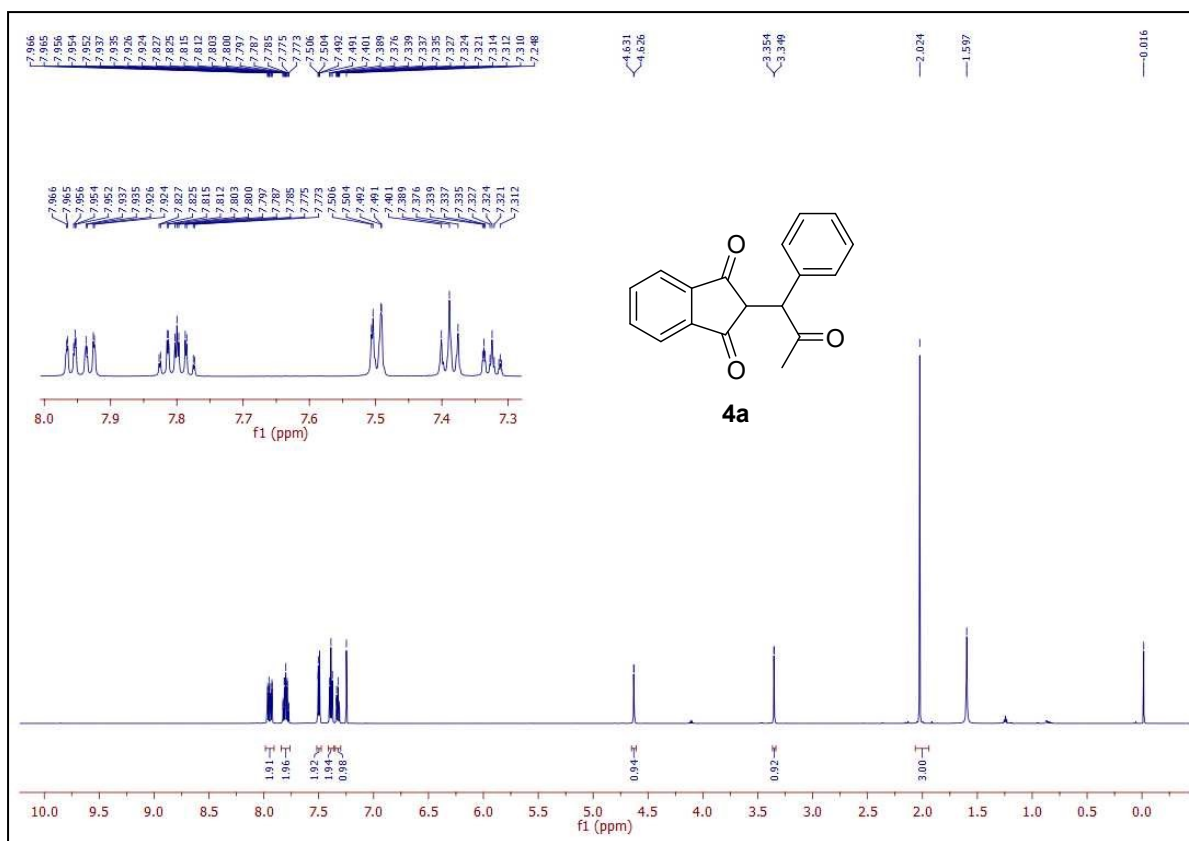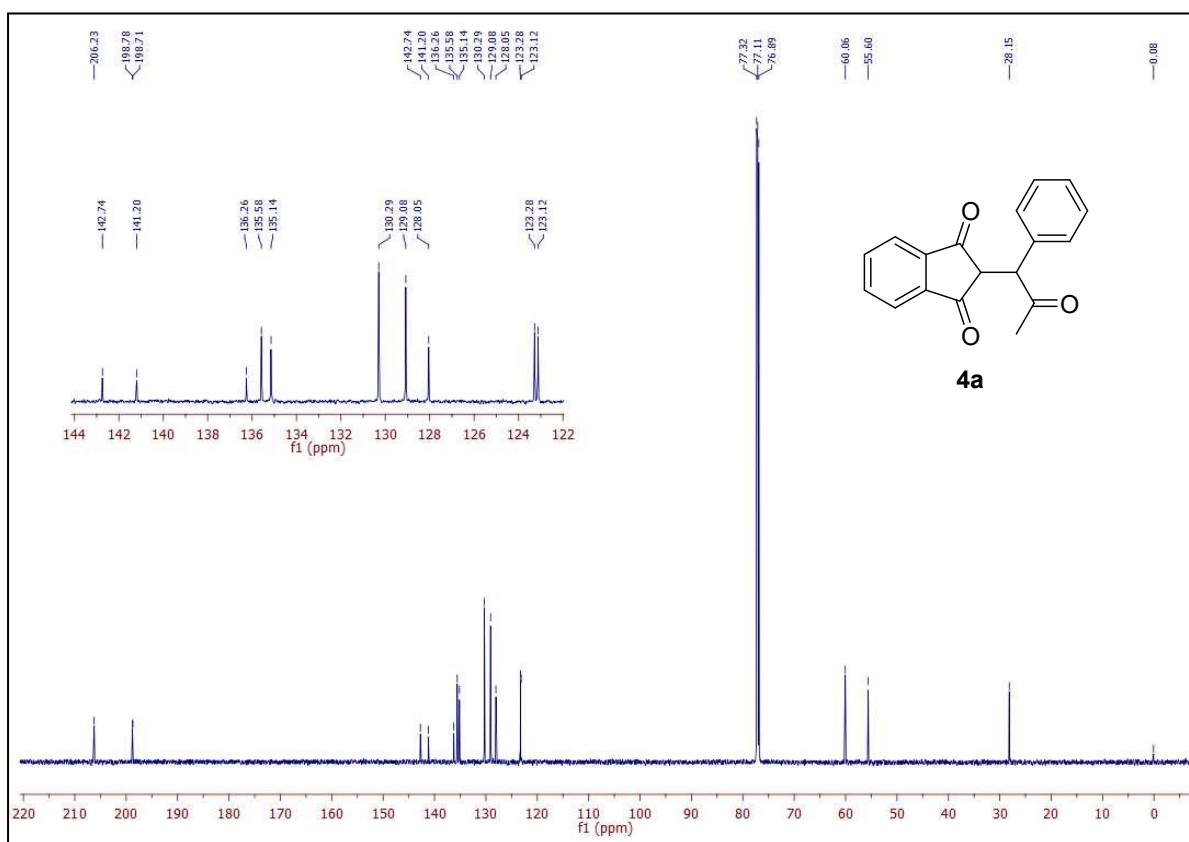



## Display Report

### Analysis Info

Analysis Name D:\Data\2021-data\EXTERNAL SAMPLES\NOV\3.d  
Method tune\_low.m  
Sample Name 3  
Comment

Acquisition Date 11/15/2021 4:47:19 PM

Operator BDAL  
Instrument maXis 255552.10138

### Acquisition Parameter

|             |            |                      |          |                  |           |
|-------------|------------|----------------------|----------|------------------|-----------|
| Source Type | ESI        | Ion Polarity         | Positive | Set Nebulizer    | 0.3 Bar   |
| Focus       | Not active | Set Capillary        | 4500 V   | Set Dry Heater   | 180 °C    |
| Scan Begin  | 50 m/z     | Set End Plate Offset | -500 V   | Set Dry Gas      | 4.0 l/min |
| Scan End    | 2000 m/z   | Set Charging Voltage | 0 V      | Set Divert Valve | Waste     |
|             |            | Set Corona           | 0 nA     | Set APCI Heater  | 0 °C      |

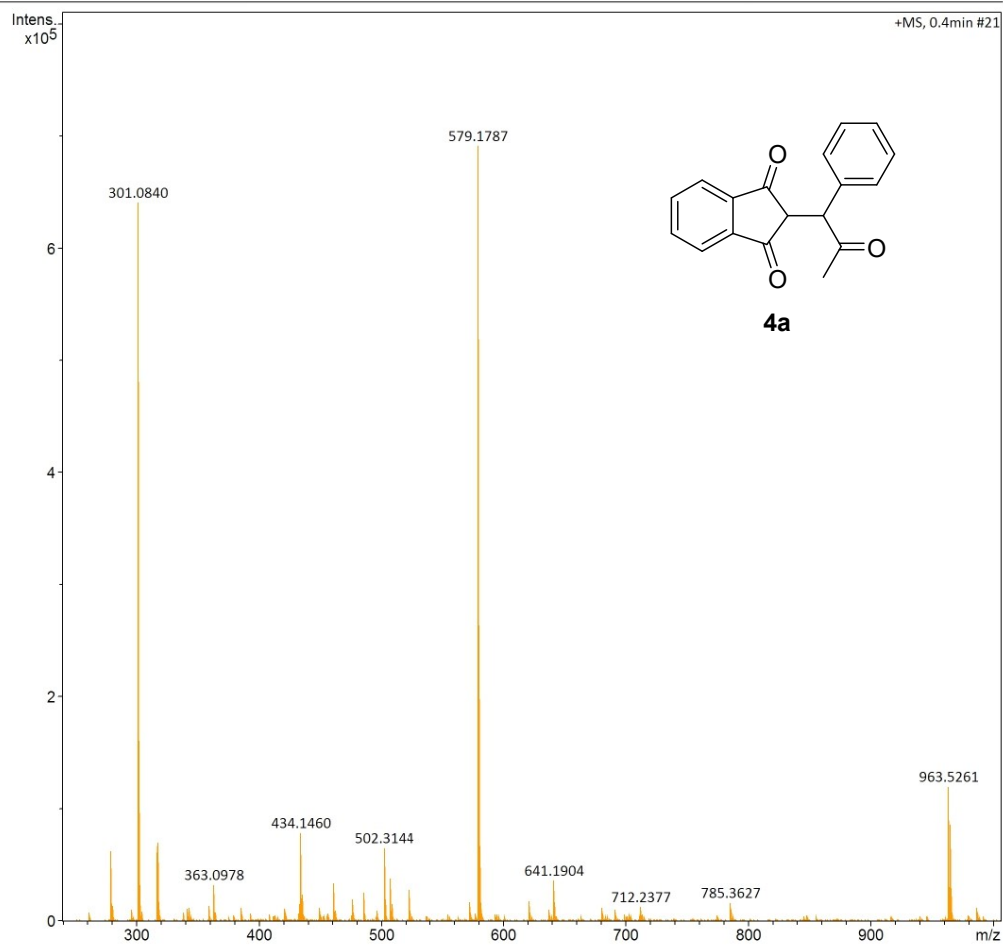

3.d

Bruker Compass DataAnalysis 4.2

printed: 11/15/2021 5:03:32 PM

by: BDAL

Page 1 of 1

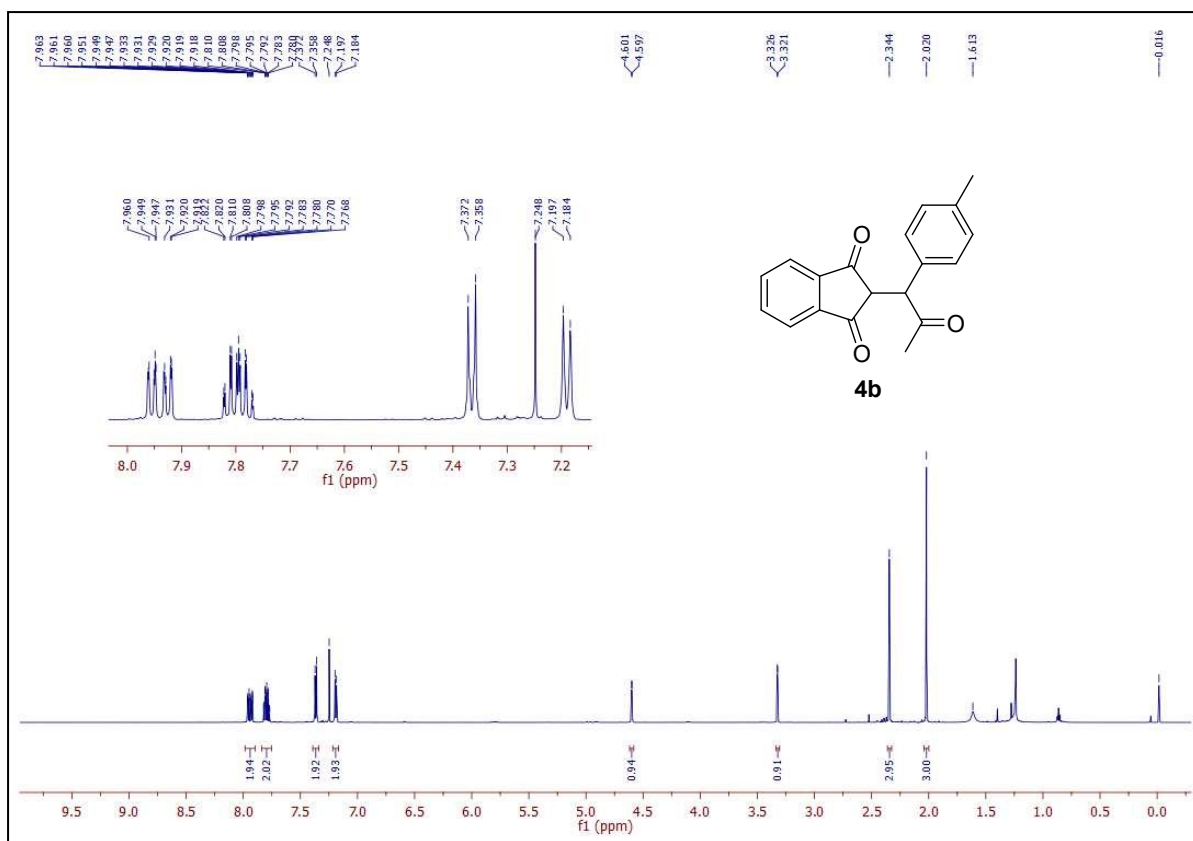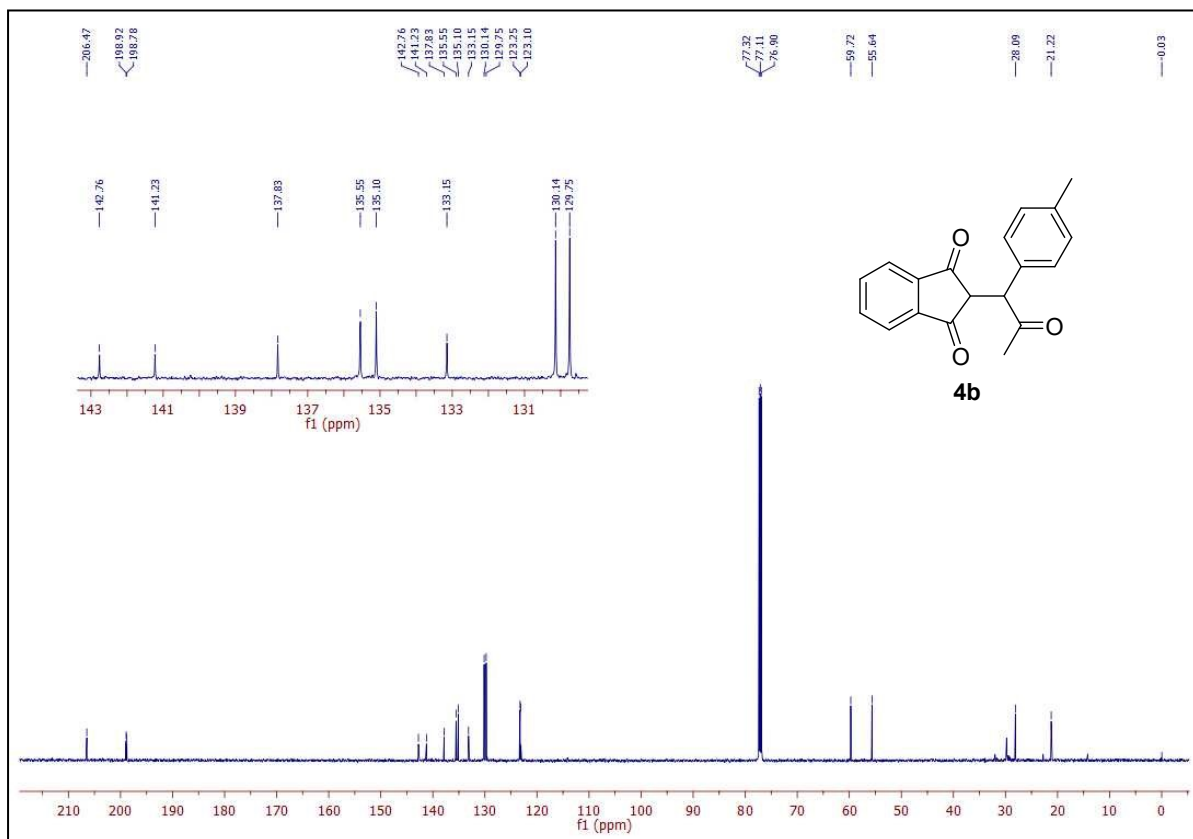

PR-4CH3

IIT(ISM),DHANBAD  
Central Research Facility,HRMS

25-Jan-2022  
12:02:49  
1: TOF MS ES+  
2.98e7

PR-4CH3 34 (0.626) Cm (32:35)  
315.0978

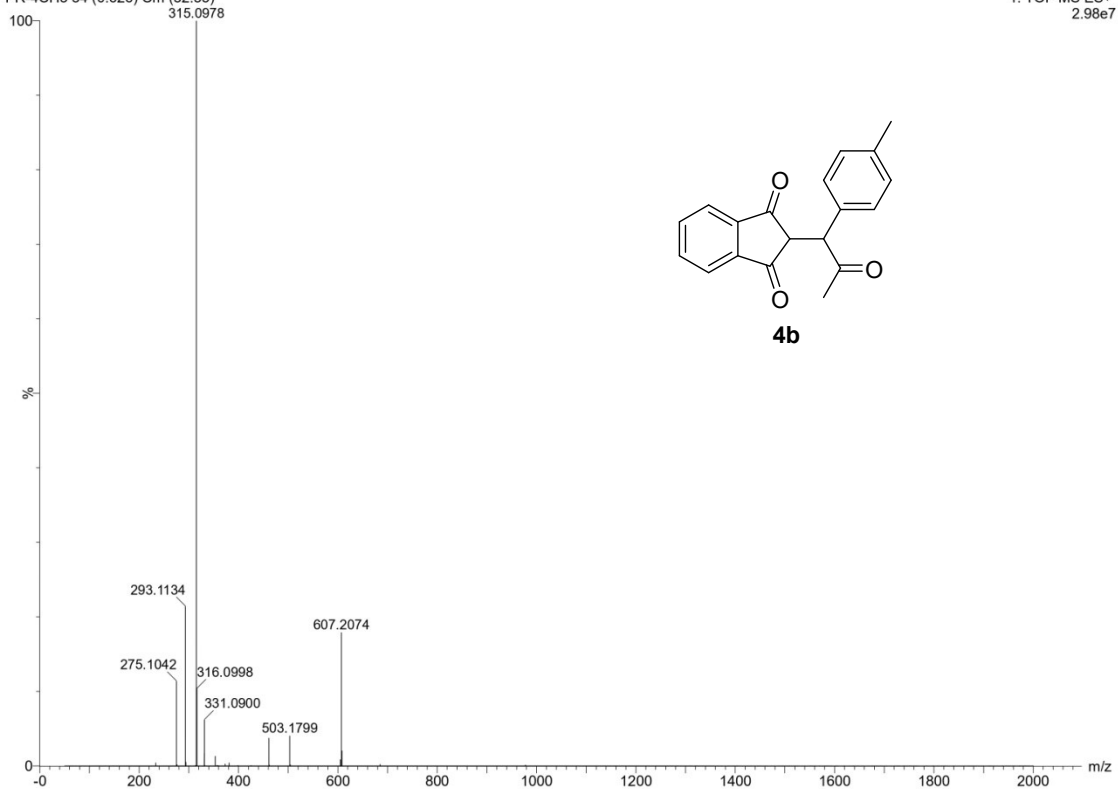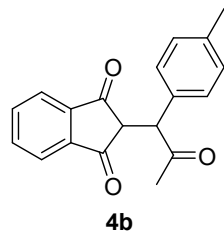

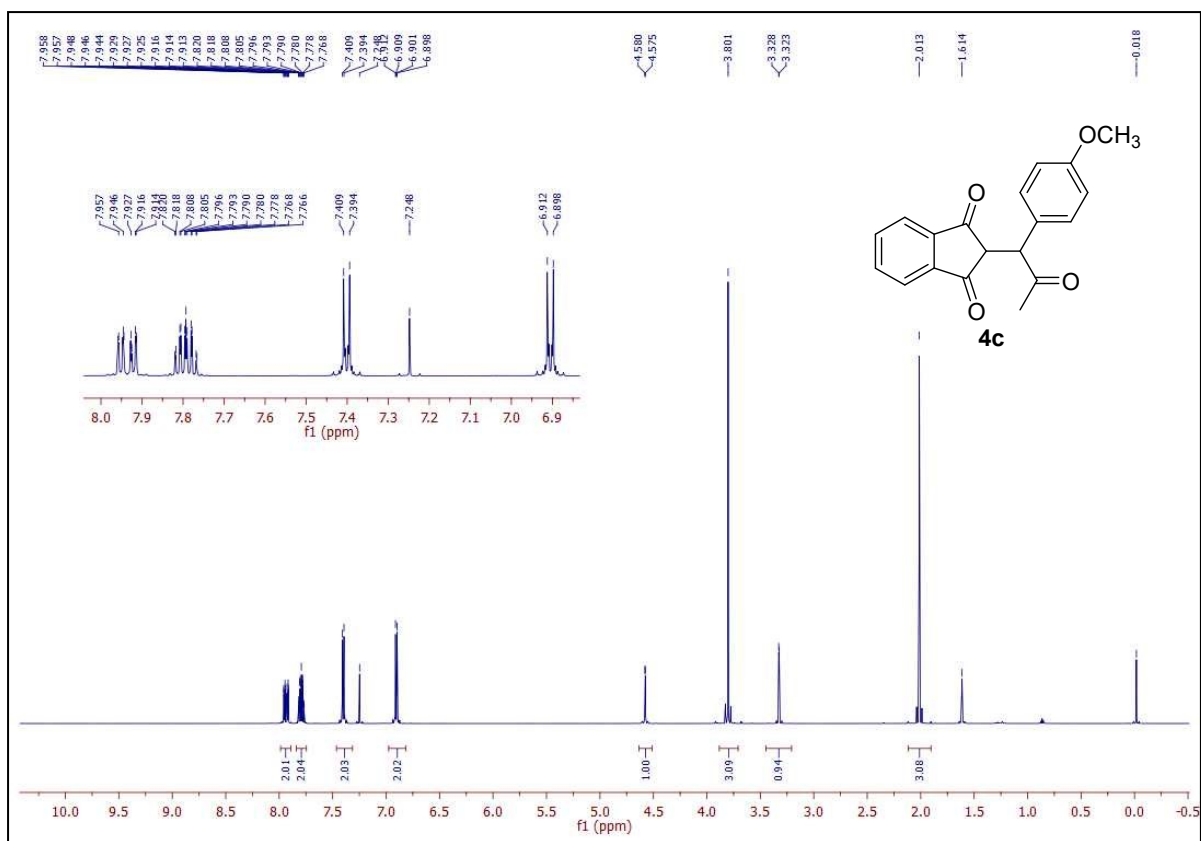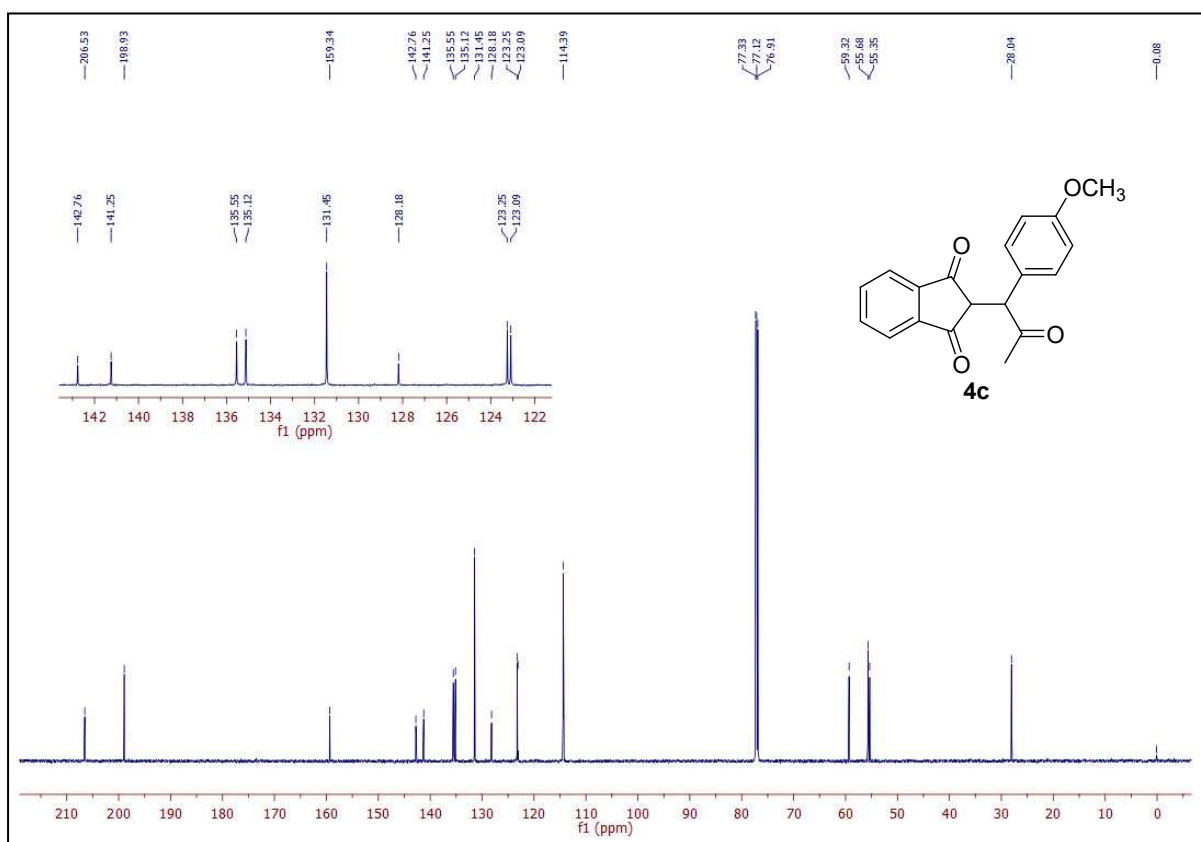

PR-4OMe\_MeOH\_re

IIT(ISM),DHANBAD  
Central Research Facility,HRMS

11-Jan-2022  
16:10:02  
1: TOF MS ES+  
1.78e7

PR-4OMe\_MeOH\_re 6 (0.130) Cm (6:7)

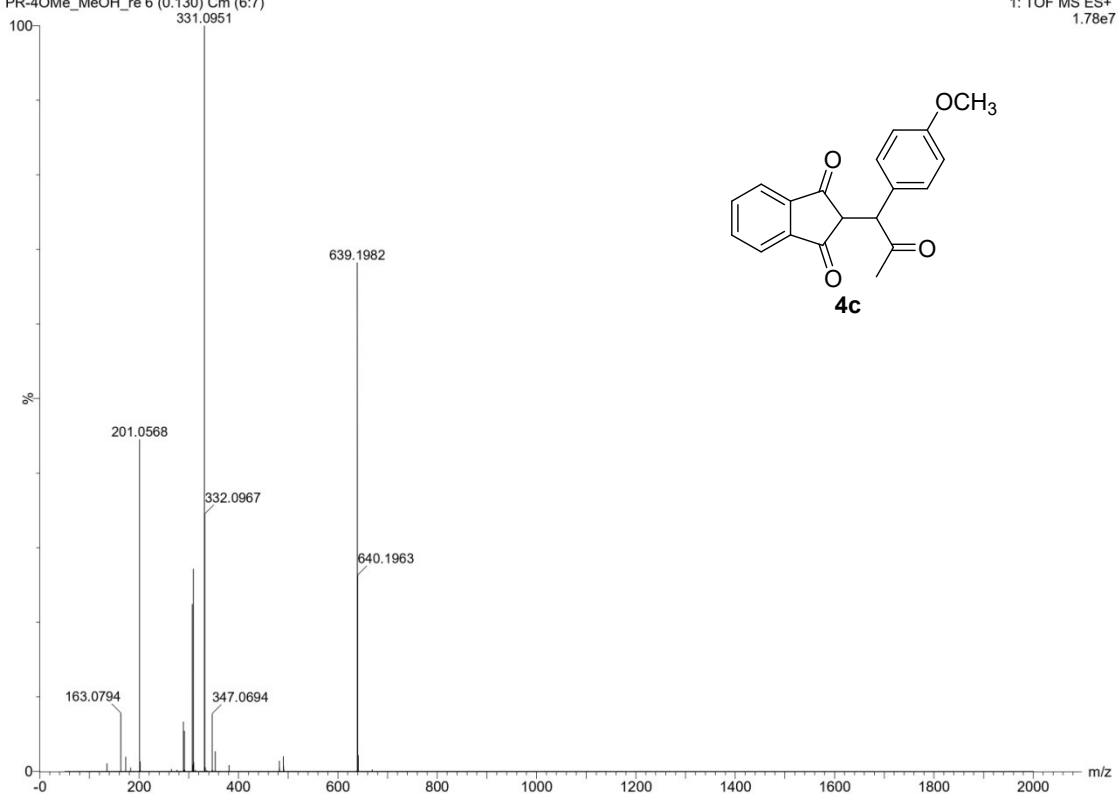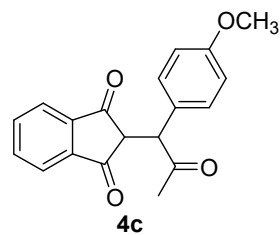

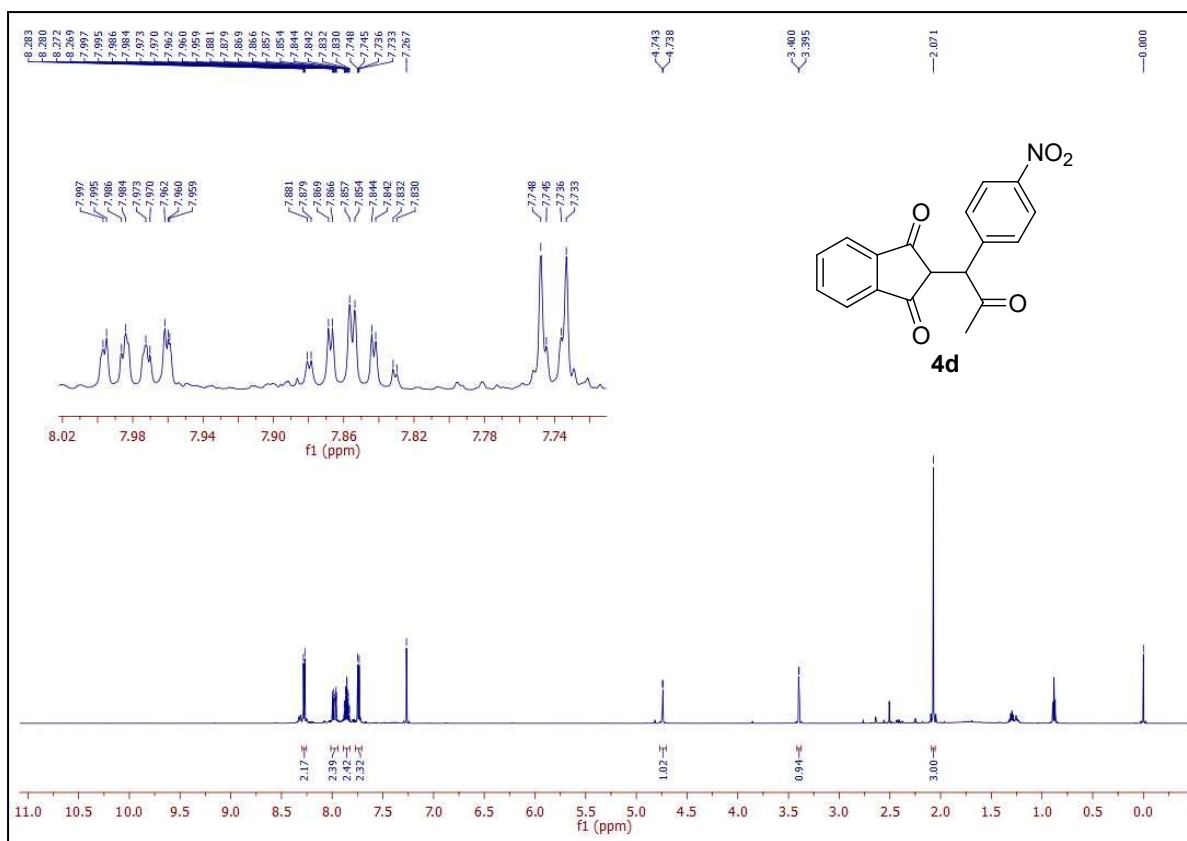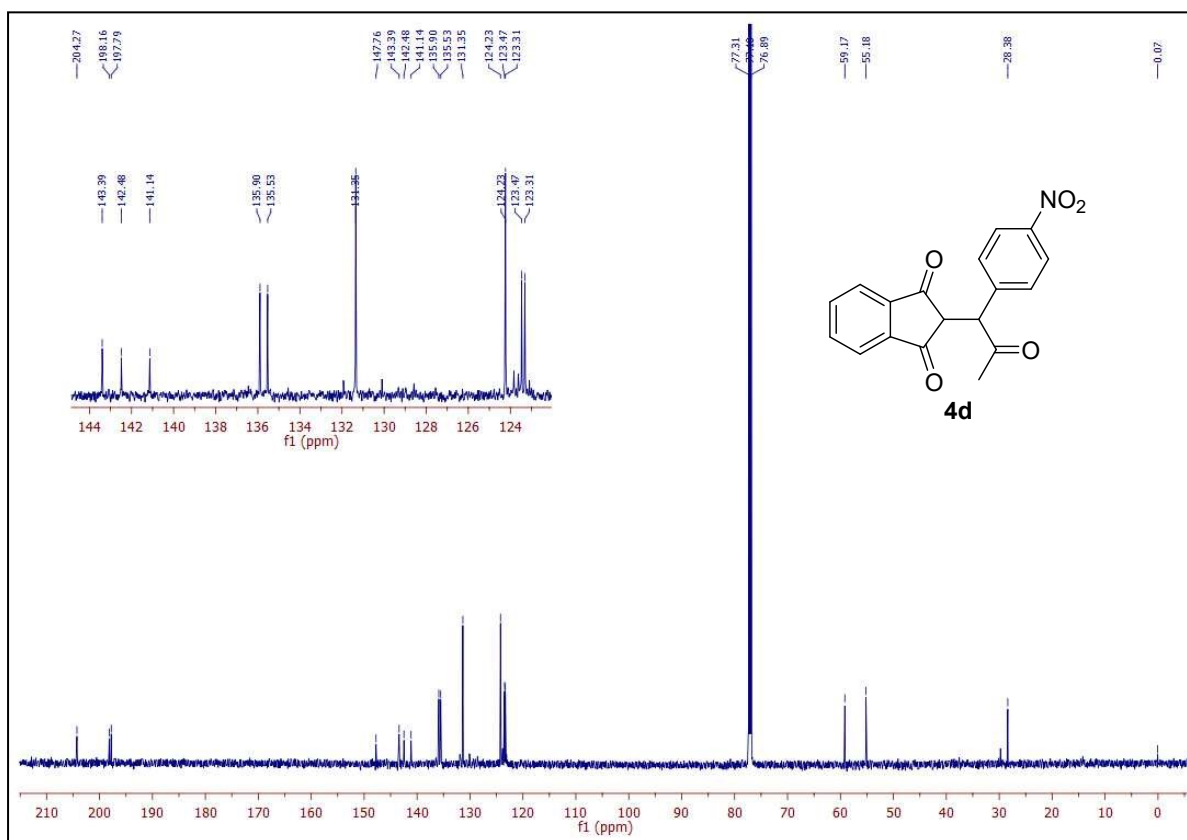

Sample Name Pavithira S(SAIF2202) Position Vial 60 Instrument Name Instrument 1 User Name  
Inj Vol 2 InjPosition SampleType Sample IRM Calibration Status Some Ions Missed  
Data Filename PR-4NO2-a.d ACQ Method ISOCRATIC.m Comment Acquired Time 2/16/2022 5:28:33 PM

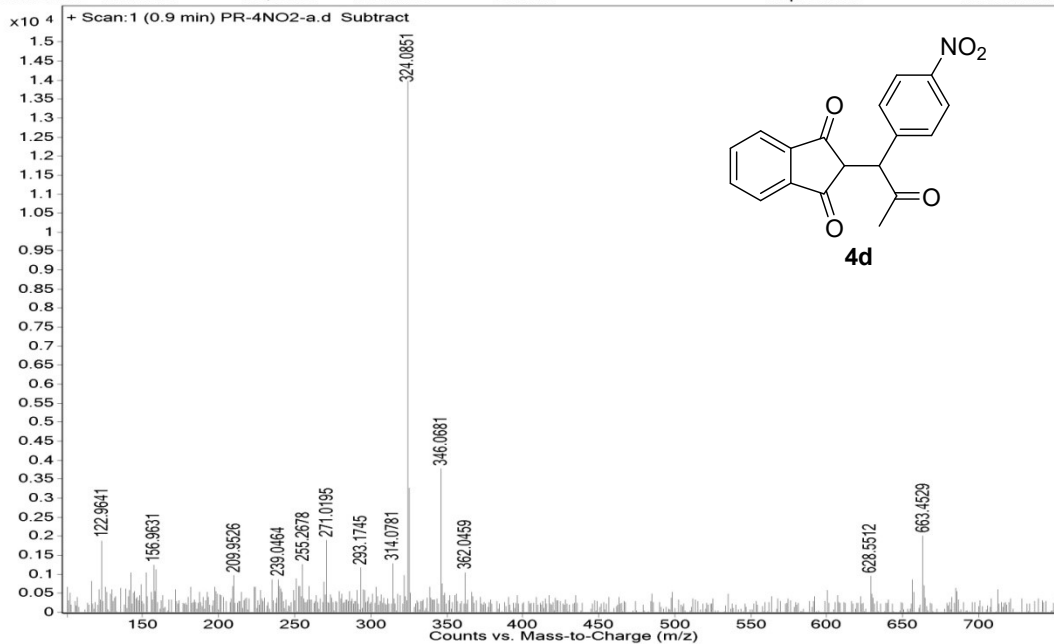

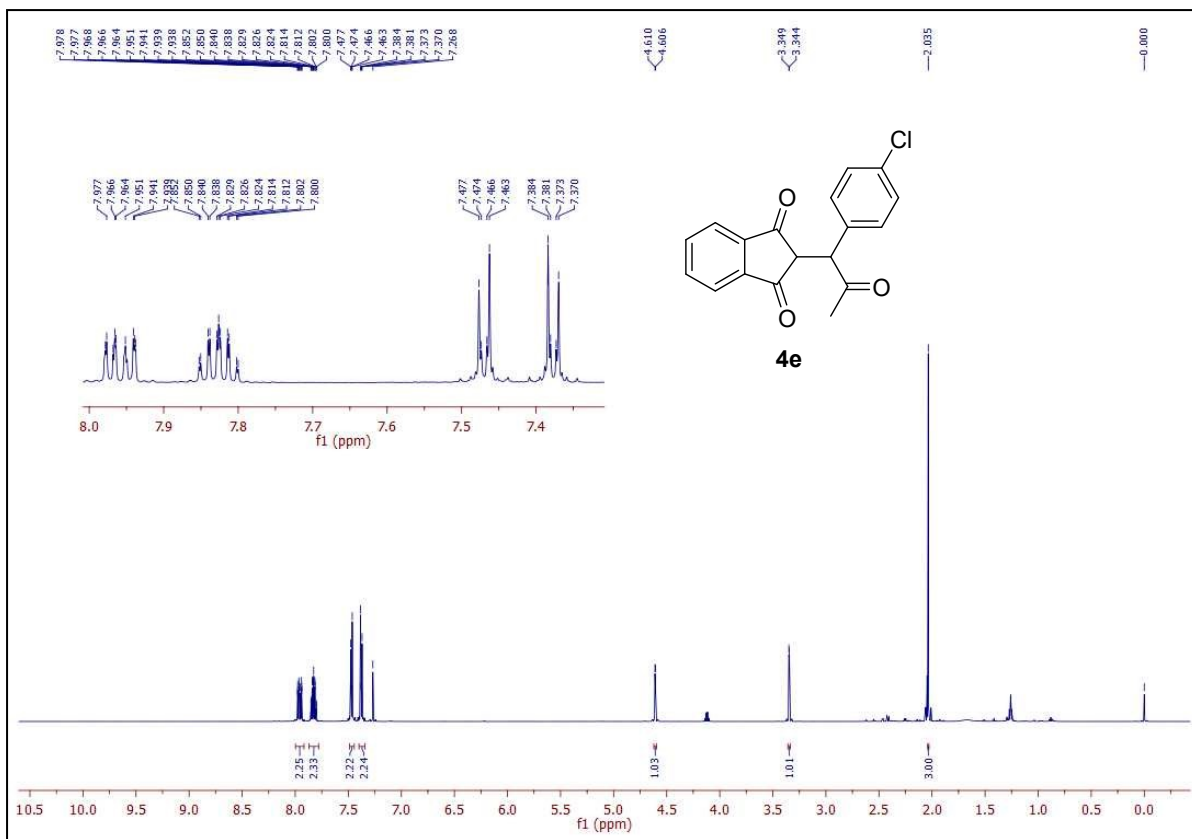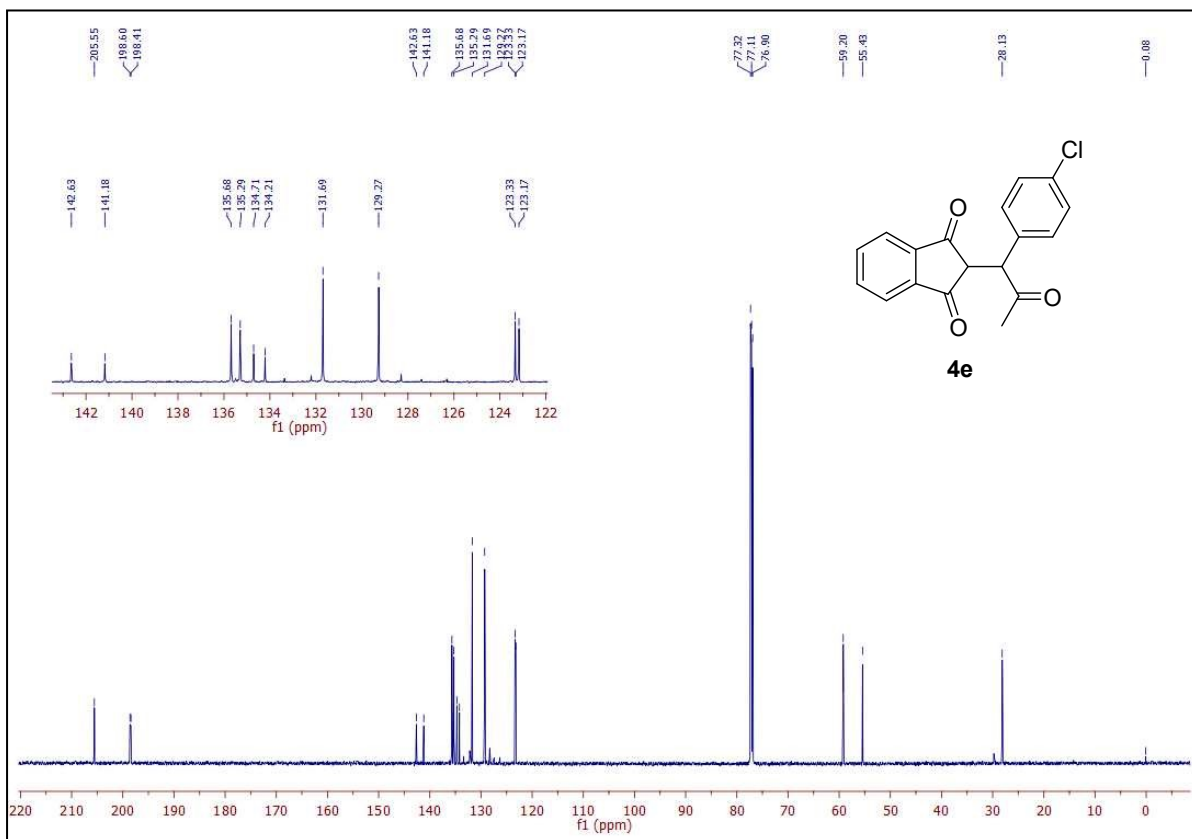



PR-4Cl\_MeOH

PR-4Cl\_MeOH 3 (0.079) Cm (3:4)

IIT(ISM),DHANBAD  
Central Research Facility,HRMS

11-Jan-2022  
16:59:20  
1: TOF MS ES+  
1.19e7

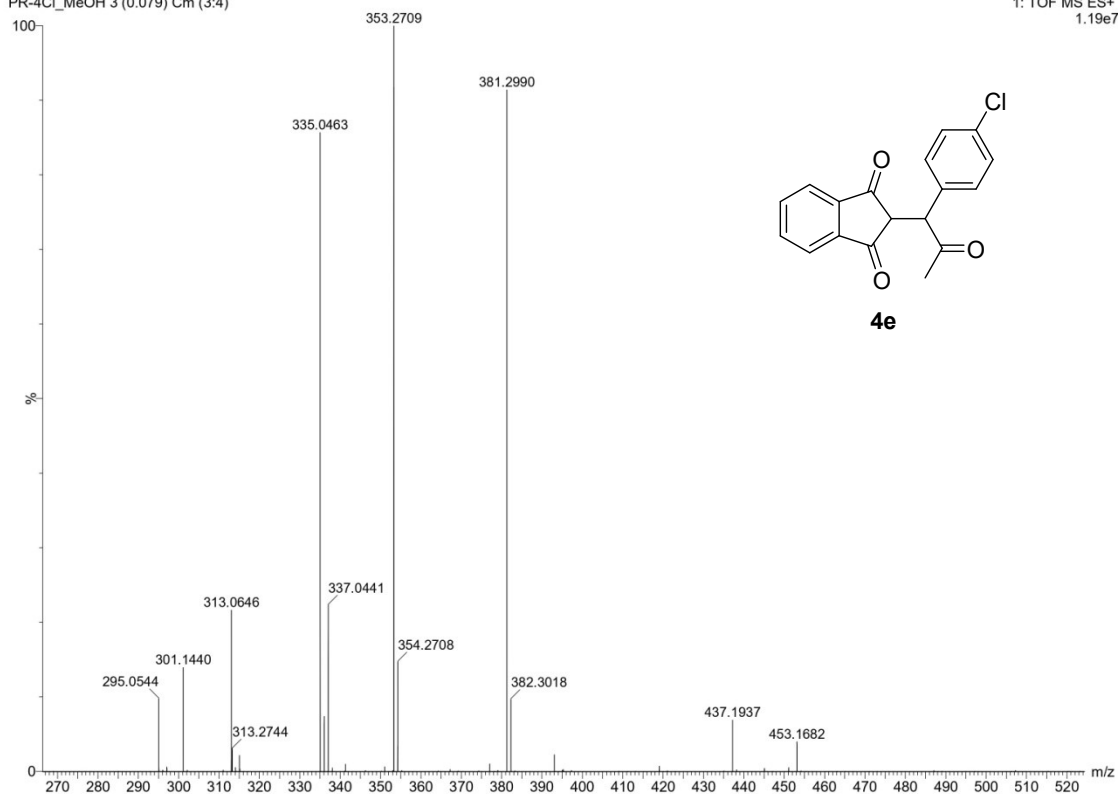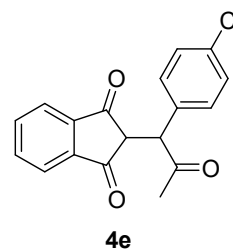

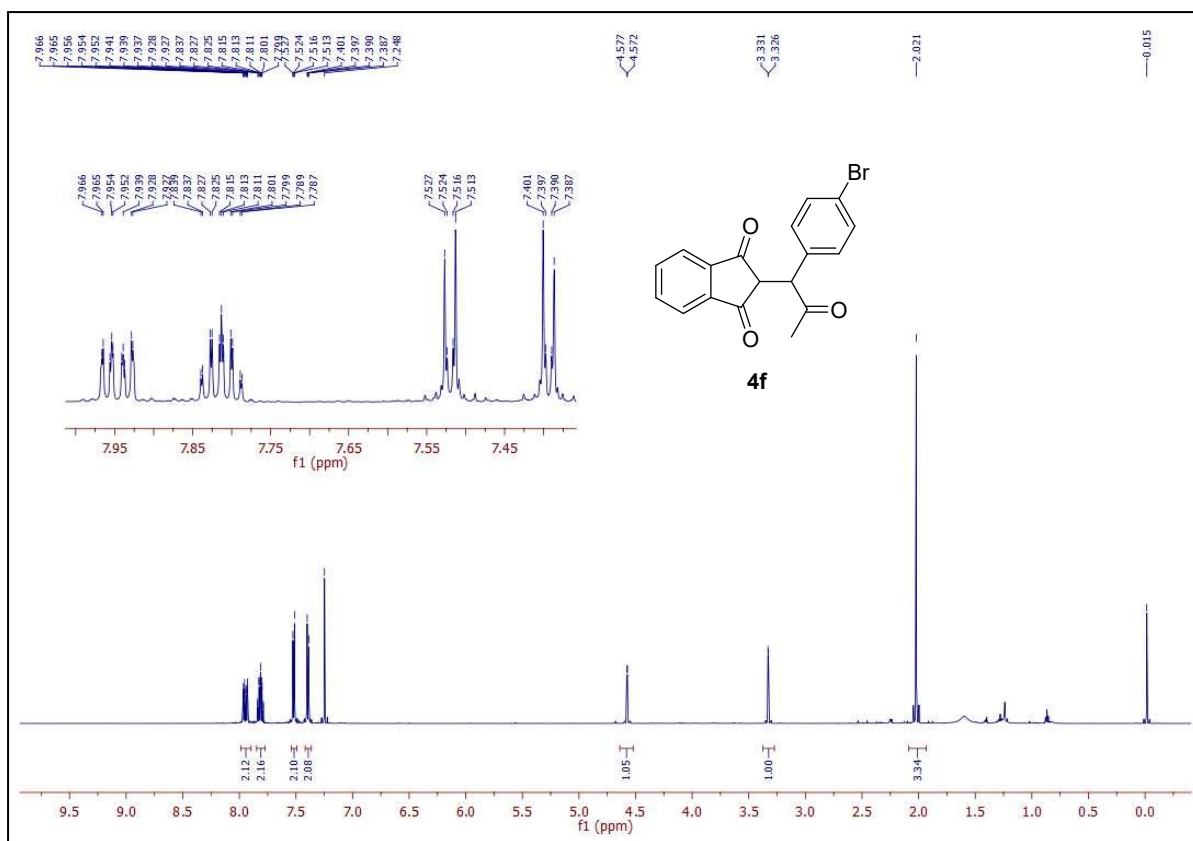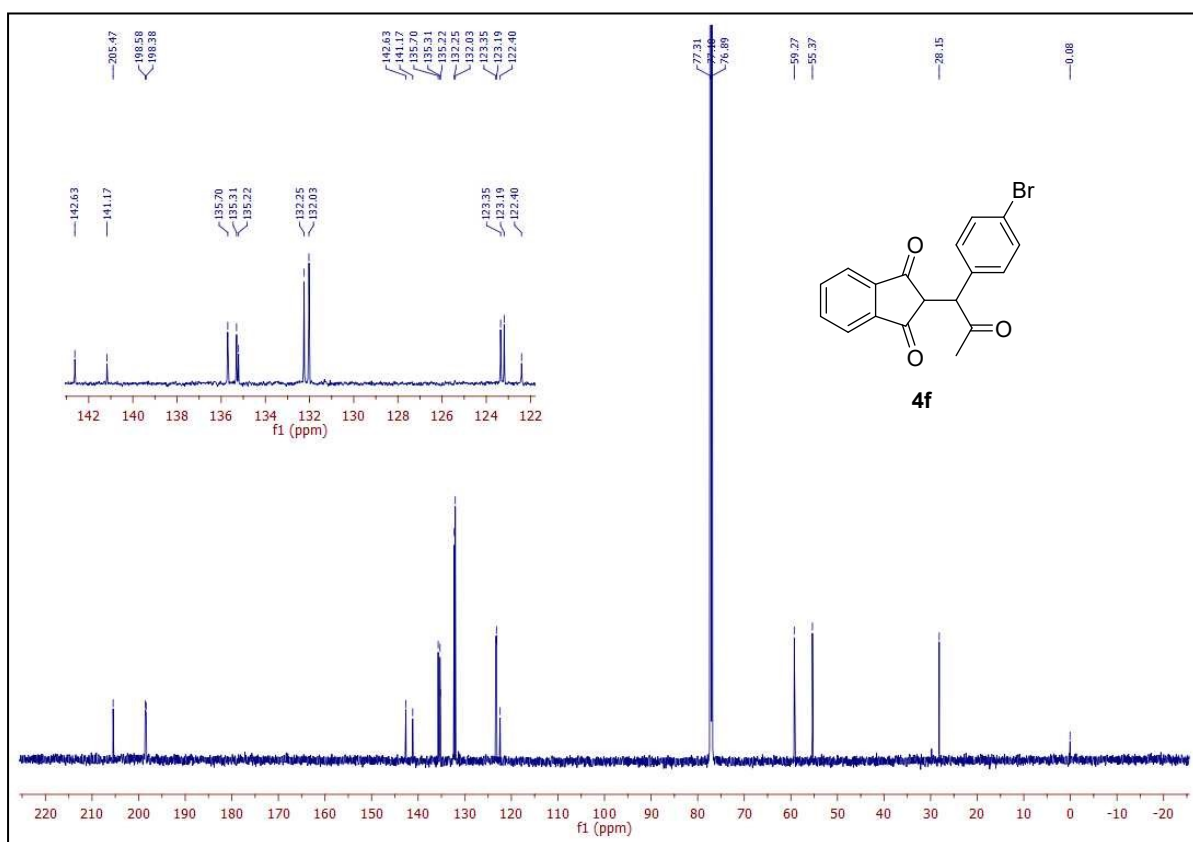

PR-4Br\_MeOH

IIT(ISM),DHANBAD  
Central Research Facility,HRMS

11-Jan-2022  
17:31:34  
1: TOF MS ES+  
5.48e4

PR-4Br\_MeOH 3 (0.079) Cm (3)

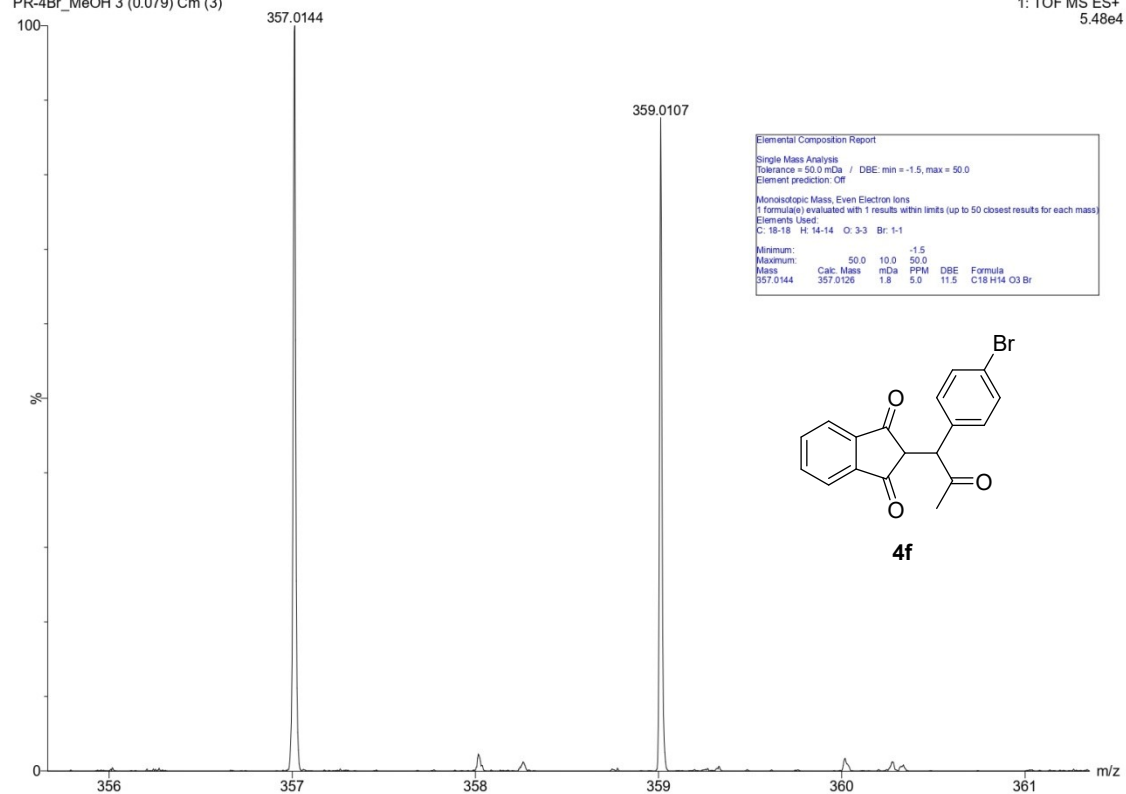

Elemental Composition Report

Single Mass Analysis  
Tolerance = 50.0 mDa / DBE: min = -1.5, max = 50.0  
Element prediction: Off

Monoisotopic Mass, Even Electron Ions  
1 formula(s) evaluated with 1 results within limits (up to 50 closest results for each mass)  
Elements Used:  
C: 18-18 H: 14-14 O: 3-3 Br: 1-1

| Minimum: | 50.0       | 10.0 | 50.0 | -1.5 |               |
|----------|------------|------|------|------|---------------|
| Maximum: | 50.0       | 10.0 | 50.0 | -1.5 |               |
| Mass     | Calc: Mass | mDa  | PPM  | DBE  | Formula       |
| 357.0144 | 357.0126   | 1.8  | 5.0  | 11.5 | C18 H14 O3 Br |

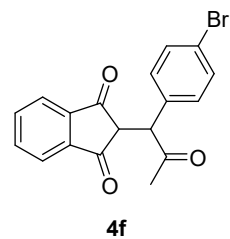

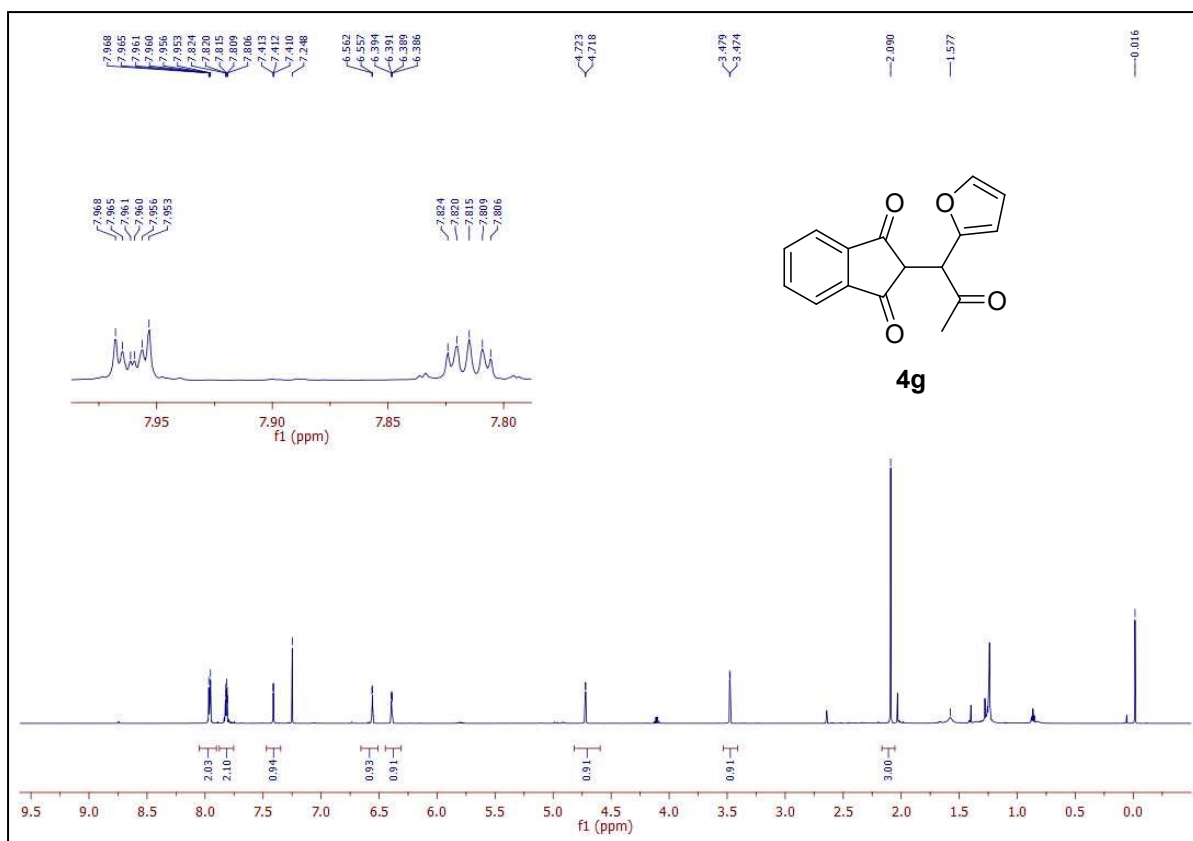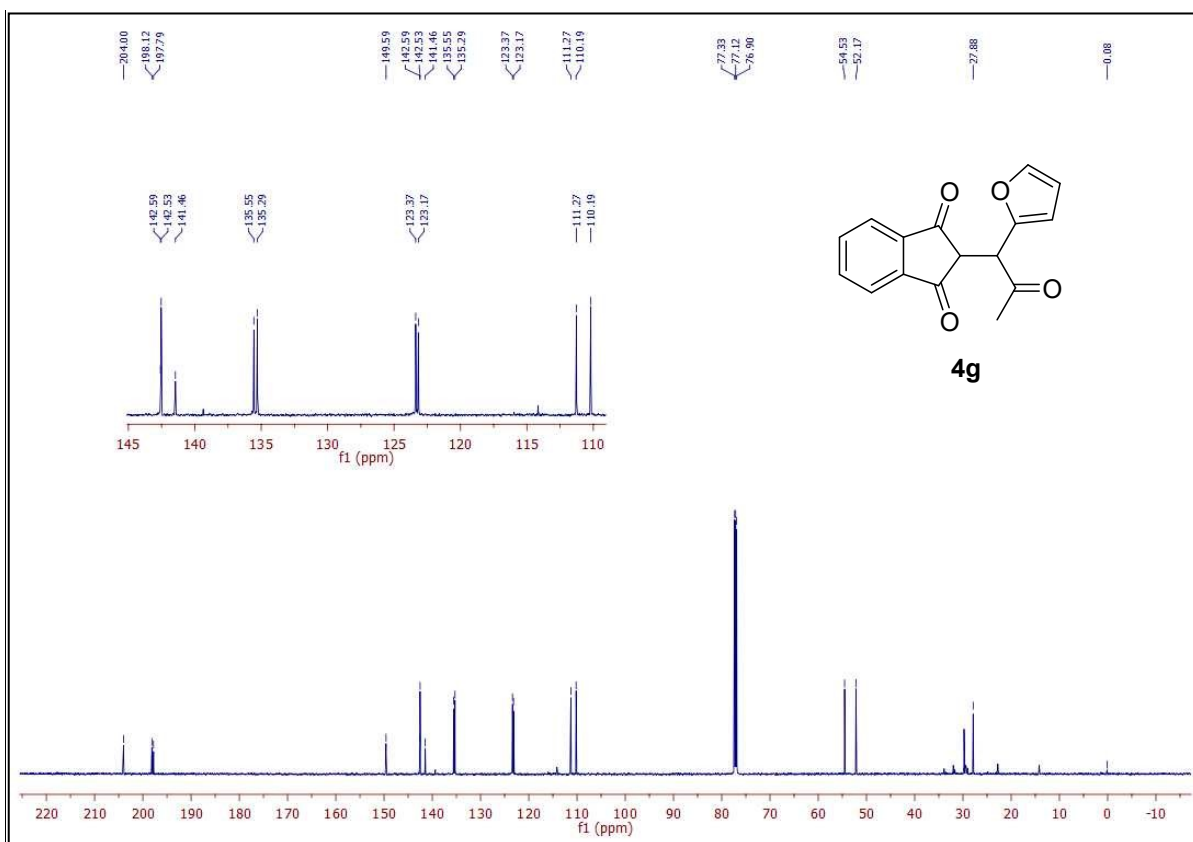

Sample Name Pavithira S(SAIF2202) Position Vial 61 Instrument Name Instrument 1 User Name  
Inj Vol 1 InjPosition Sample SampleType IRM Calibration Status Some Ions Missed  
Data Filename PR-FURYL.d ACQ Method ISOCRATIC.m Comment Acquired Time 2/16/2022 2:30:18 PM

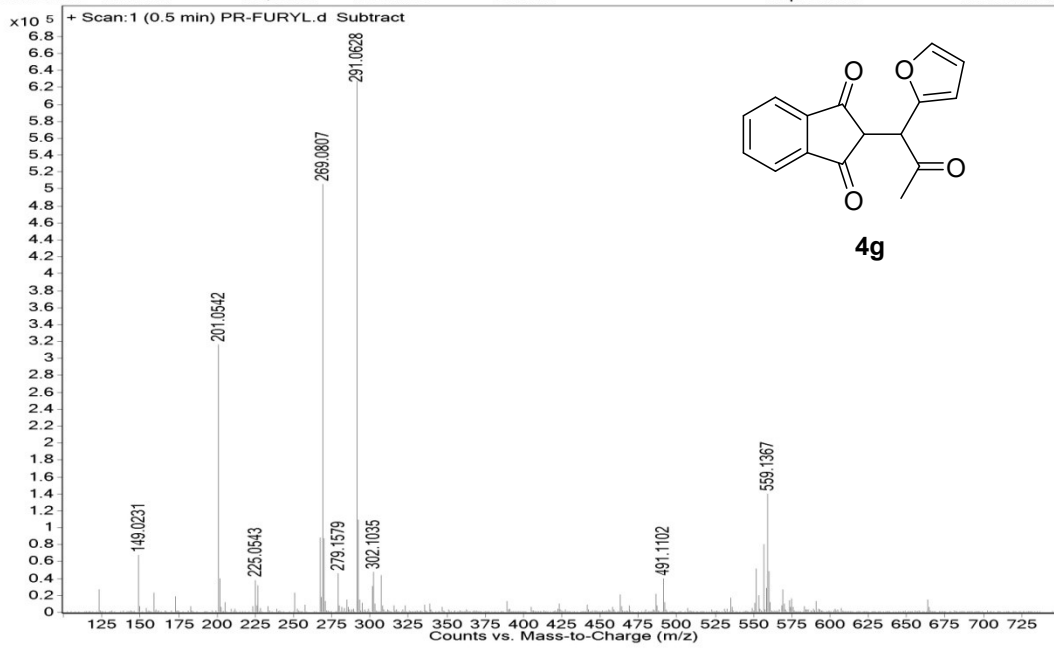

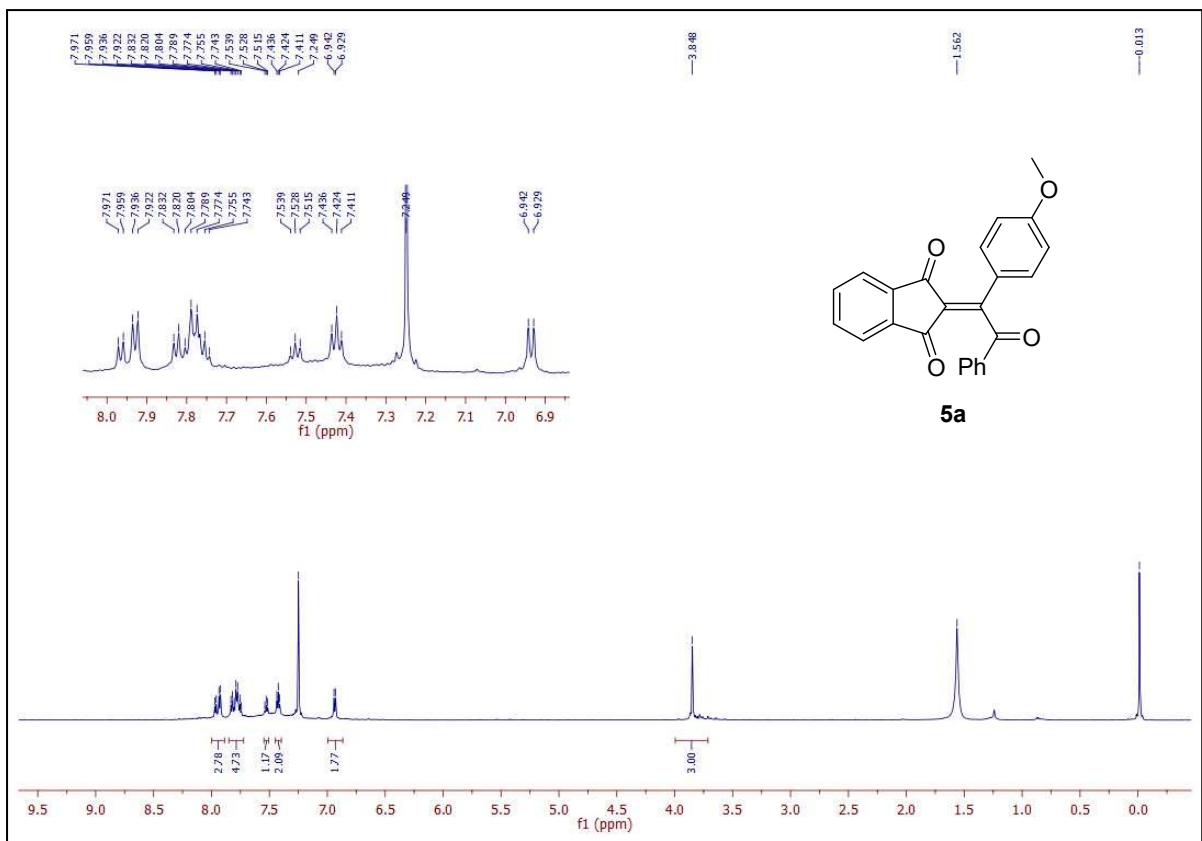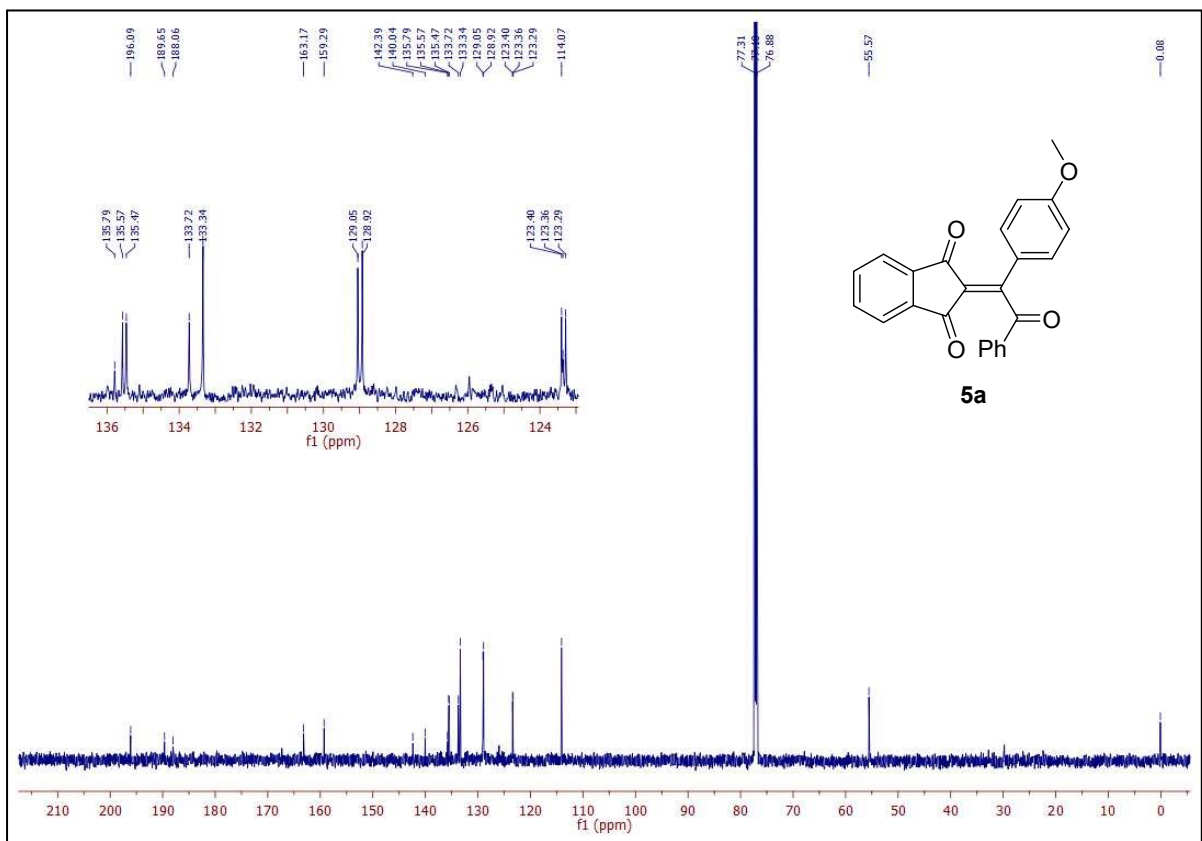

Phenyl-4-OMe\_MeOH

IIT(ISM),DHANBAD  
Central Research Facility,HRMS

12-Jan-2022  
12:09:46  
1: TOF MS ES+  
3.74e7

Phenyl-4-OMe\_MeOH 4 (0.096) Cm (1:5)

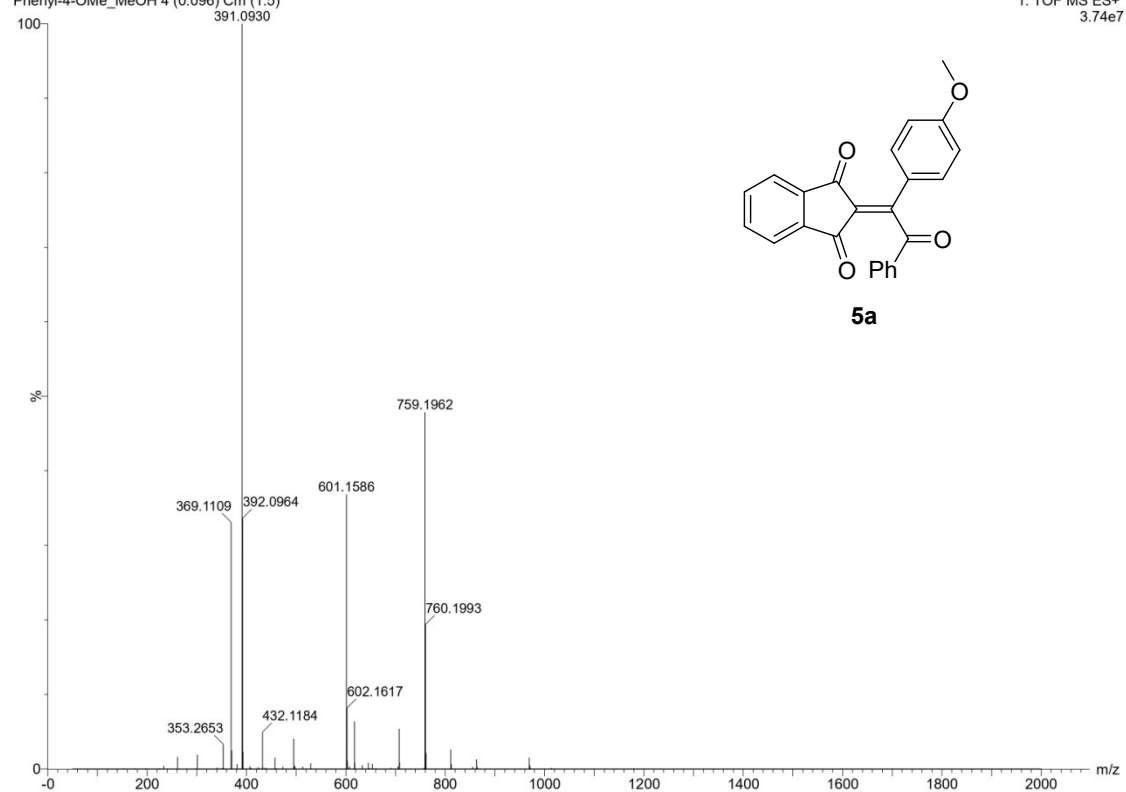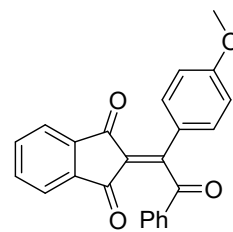

**5a**

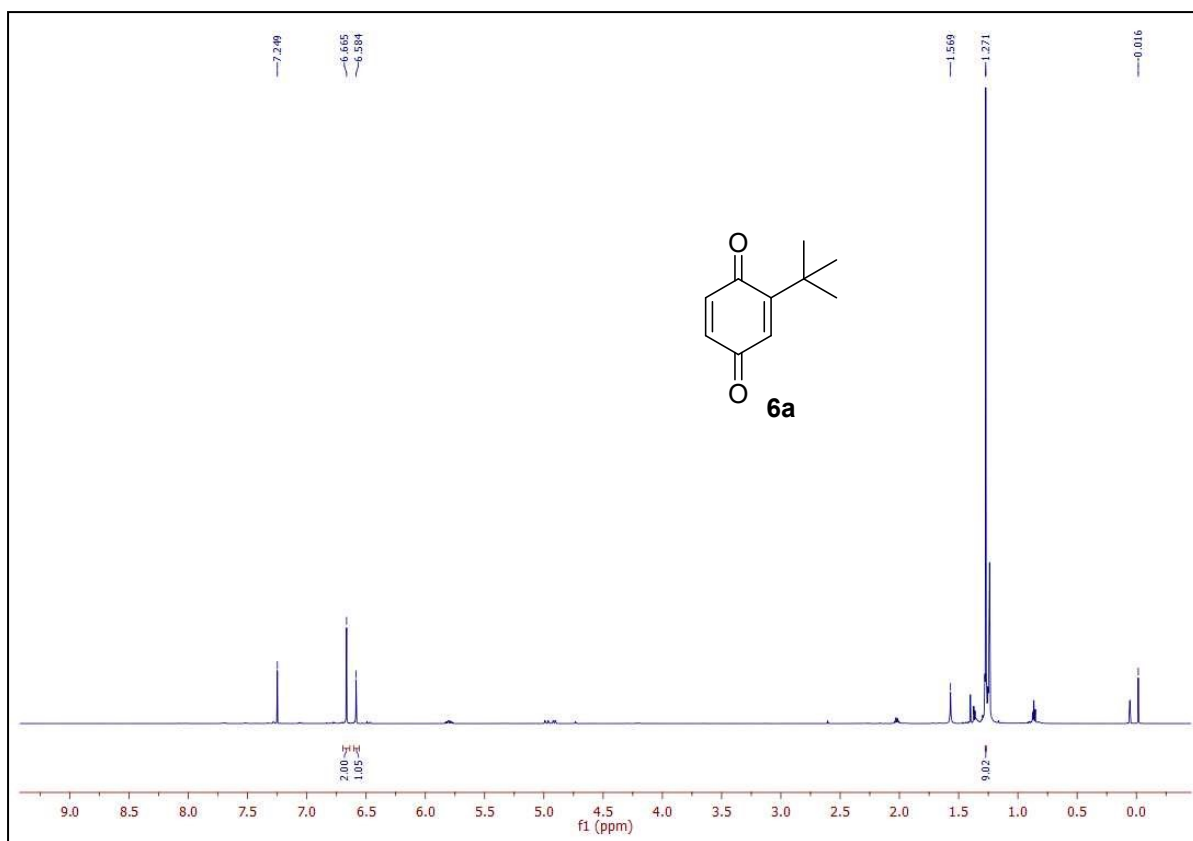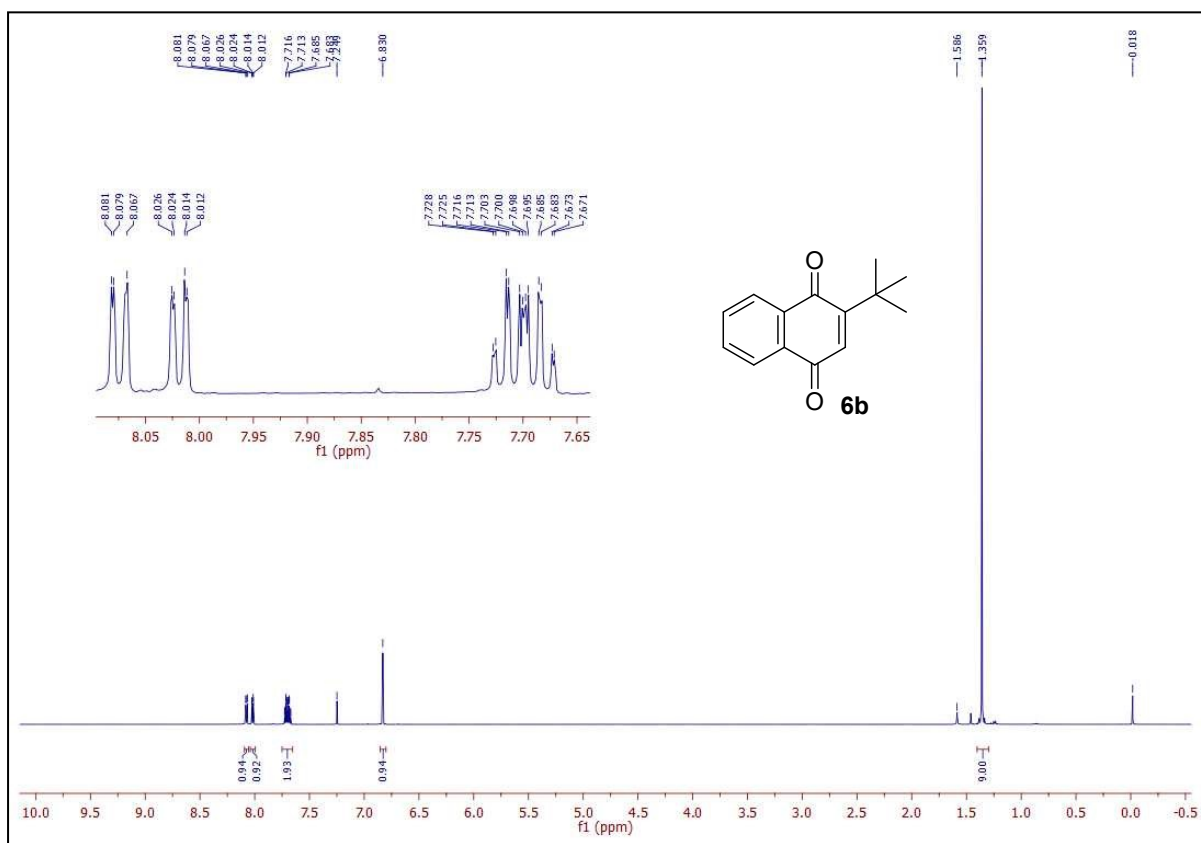





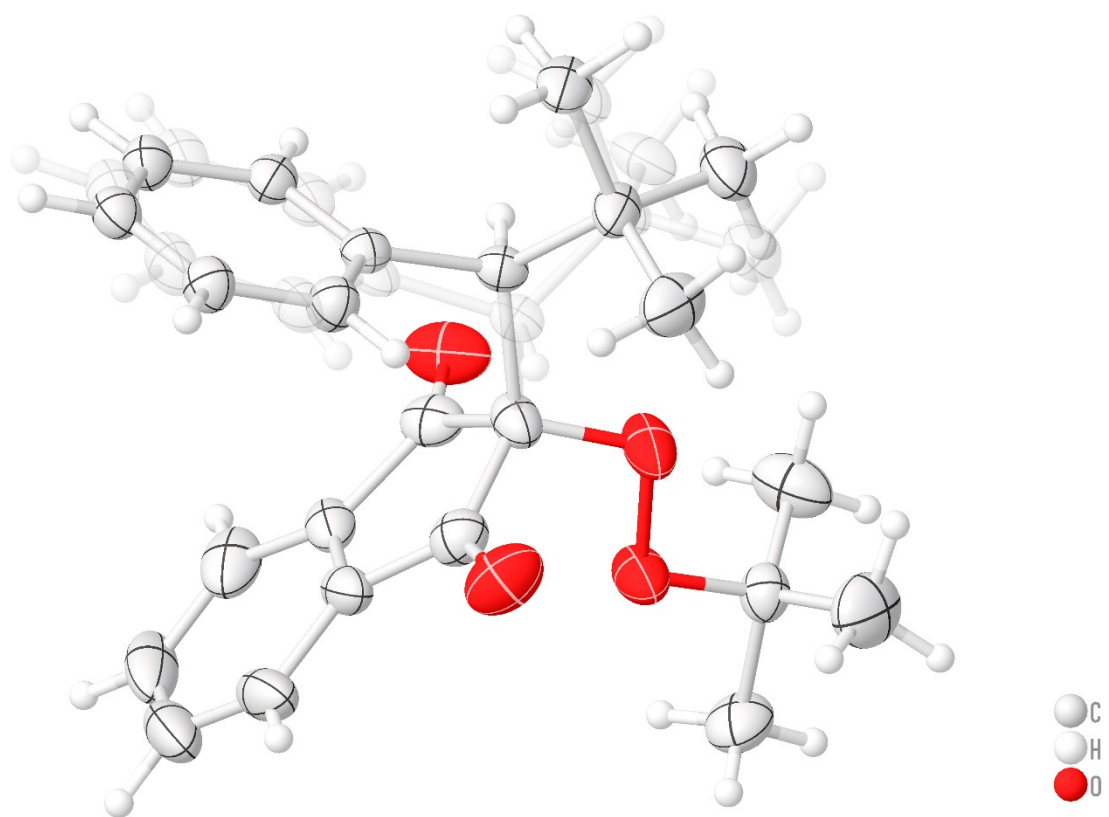

**Figure. S1.** Disordered structure of **3b** (ORTEP drawn at 25% probability)

## In silico studies

The given below molecules were chosen for in silico studies

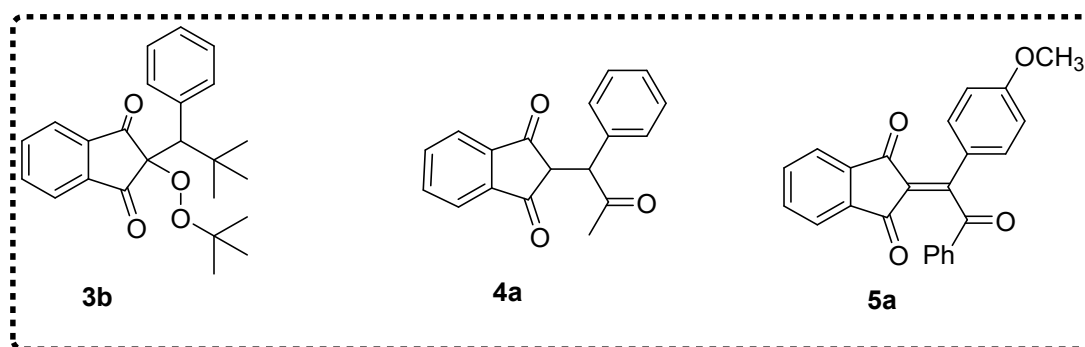

## Prediction of Biological Activity

The bioactivities of the three synthesized compounds were predicted using the PASS (Prediction of Activity Spectra for Substances) online server ([way2drug.com/passonline/predict.php](http://way2drug.com/passonline/predict.php)). Currently, this online server predicts more than 4000 kinds of biological activity and provides the probability of being active (Pa) and the probability of being inactive (Pi) for the given molecule. The bioactivity of these compounds with more than 0.8 (Pa) are tabulated.

**Table S1:** Predicted bioactivity for the synthesized compounds

| Pa                                   | Pi    | Activity                                                             |
|--------------------------------------|-------|----------------------------------------------------------------------|
| <b>3b (Peroxygenated derivative)</b> |       |                                                                      |
| 0.821                                | 0.015 | Antiseborrheic                                                       |
| 0.815                                | 0.022 | Testosterone17 $\beta$ -dehydrogenase (NADP <sup>+</sup> ) inhibitor |
| 0.820                                | 0.031 | CYP2C12 substrate                                                    |
| 0.817                                | 0.029 | Aspulvinone dimethylallyltransferase inhibitor                       |
| <b>4a (Acetylated derivative)</b>    |       |                                                                      |
| 0.942                                | 0.002 | Gluconate 2-dehydrogenase (acceptor) inhibitor                       |
| 0.920                                | 0.004 | Anticoagulant                                                        |
| 0.833                                | 0.011 | Mucomembranous protector                                             |
| <b>5a (Benzoylated derivative)</b>   |       |                                                                      |
| 0.932                                | 0.004 | Aspulvinone dimethylallyltransferase inhibitor                       |

|       |       |                                                      |
|-------|-------|------------------------------------------------------|
| 0.905 | 0.011 | CYP2C12 substrate                                    |
| 0.894 | 0.005 | Chlordecone reductase inhibitor                      |
| 0.890 | 0.004 | Feruloyl esterase inhibitor                          |
| 0.884 | 0.015 | Membrane integrity agonist                           |
| 0.866 | 0.006 | Gluconate 2-dehydrogenase (acceptor) inhibitor       |
| 0.860 | 0.014 | Ubiquinol-cytochrome-c reductase inhibitor           |
| 0.833 | 0.004 | 3-Hydroxybenzoate 6-monooxygenase inhibitor          |
| 0.819 | 0.016 | Antiseborrheic                                       |
| 0.808 | 0.010 | Nicotinic alpha6beta3beta4alpha5 receptor antagonist |
| 0.804 | 0.006 | Alkane 1-monooxygenase inhibitor                     |
| 0.801 | 0.004 | Carminative                                          |
| 0.806 | 0.009 | Aldehyde oxidase inhibitor                           |

## Molecular docking

To validate the predicted bioactivity and to see the binding modes of these compounds at the active site of the target proteins, we have performed molecular docking analysis for these compounds with selected protein targets. All the docking calculations were carried out using the Schrodinger software (Schrodinger Release 2021-4 Schrodinger, LLC, New York, 2021) and proteins and ligands were prepared as described in our earlier report.<sup>5</sup> Two target proteins such as Gluconate 2-dehydrogenase from a plant pathogen *Pantoea cypripedii* and cytochrome P450 2C12 (CYP2C12) from *Rattus norvegicus* were selected for molecular docking. The 3D structure of Gluconate 2-dehydrogenase (uniport id: O34213) was retrieved from AlphaFold database<sup>6</sup> and compound **4a** was docked with this protein. Compounds **3b** and **5a** were docked with CYP2C12 protein. The 3D structure of P450 2C12 was built using the structure of CYP2C9 from *Homo sapiens* (PDB ID: 5X23) with SWISS Model server (<https://swissmodel.expasy.org>). The CYP2C12 and CYP2C9 share 65.81% sequence identity. The active site of Gluconate 2-dehydrogenase was predicted using the sitemap module of the Schrodinger suite, whereas the active site of CYP2C12 was defined based on the losartan drug (used to treat high blood pressure, heart failure and diabetic kidney diseases) complexed with CYP2C9 protein. We noted that losartan drug bound at the three different sites on the CYP2C9 protein. The same sites were used for CYP2C12 protein for docking simulation. For Gluconate 2-dehydrogenase, five active sites were predicted by the sitemap module. The glide XP (extra

precision) module was used for all docking calculations. The glide XP scores for these three compounds at different active sites of Gluconate dehydrogenase and P450 2C12 are summarized in Table S2.

**Table S2:** Glide XP docking score (in kcal/mol)

| Compound  | Protein target            | Glide XP score |
|-----------|---------------------------|----------------|
| <b>3b</b> | P450 2C12                 |                |
|           | Site 1                    | -3.767         |
|           | Site 2                    | -2.267         |
|           | Site 3                    | -2.709         |
| <b>4a</b> | Gluconate 2-dehydrogenase |                |
|           | Site 1                    | -7.031         |
|           | Site 2                    | -5.681         |
|           | Site 3                    | -5.796         |
|           | Site 4                    | -5.836         |
|           | Site 5                    | -3.909         |
| <b>5a</b> | P450 2C12                 |                |
|           | Site 1                    | -4.738         |
|           | Site 2                    | -0.173         |
|           | Site 3                    | -4.533         |

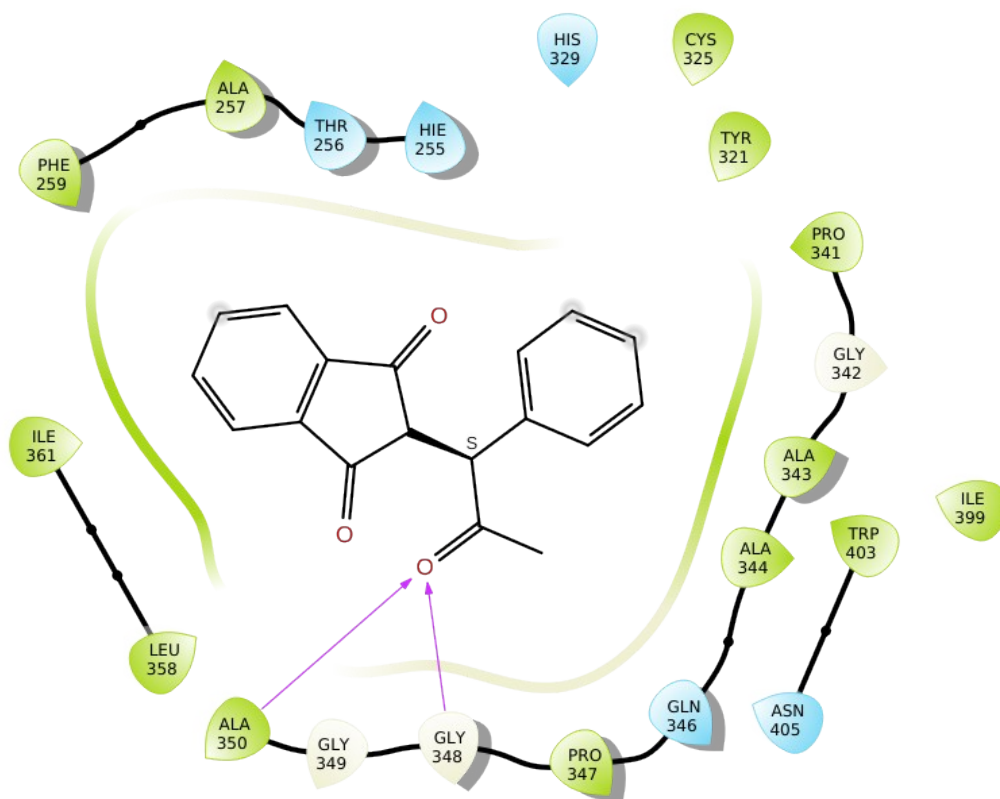

**Figure. S2.** Binding mode of **4a** at site 1 of Gluconate 2-dehydrogenase.

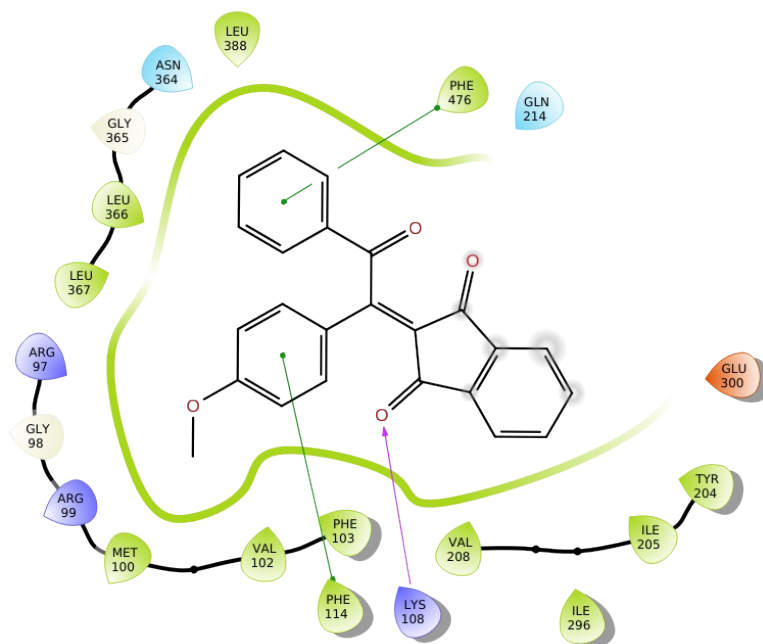

**Figure. S3.** Binding mode of **5a** at the site 1 of P450 2C12 protein.

## References

- 1 Y. -C. Liou, Y. -A. Lin, K. Wang, J. -C. Yang, Y. -J. Jang, W. Lin and Y. -C. Wu, *Int. J. Mol. Sci.* 2021, **22**, 6251.
- 2 M. H. Ali, A. Welker, C. A. York, *Synthesis* 2015, **47**, 3207-3211.
- 3 P. T. Perumal and M. V. Bhatt, *Proc. Indian Acad. Sci. (Chem. Sci.)*. 1995, **107**, 567-572.
- 4 A. Russo, A Lattanzi, *Org. Biomol. Chem.*, 2010, **8**, 2633–2638.
- 5 A. A. Al-Mutairi, K. Alagappan, O. Blacque, M. A. Al-Alshaikh, A. A. El-Emam, M. J. Percino and S. Thamocharan. *ACS Omega*, 2021, **6**, 27026-27037
- 6 J. Jumper, R. Evans, A. Pritzel, T. Green, M. Figurnov, O. Ronneberger, K. Tunyasuvunakool, R. Bates, A. Žídek, A. Potapenko, A. Bridgland, C. Meyer, S. A. A. Kohl, A. J. Ballard, A. Cowie, B. Romera-Paredes, S. Nikolov, R. Jain, J. Adler, T. Back, S. Petersen, D. Reiman, E. Clancy, M. Zielinski, M. Steinegger, M. Pacholska, T. Berghammer, S. Bodenstein, D. Silver, O. Vinyals, A. W. Senior, K. Kavukcuoglu, P. Kohli and D. Hassabis. *Nature*, 2021, **596**, 583-589.
